1 **Identification of the unwinding region in the *Clostridioides difficile* chromosomal**  
2 **origin of replication**

3

4 **Ana M. Oliveira Paiva<sup>1,2</sup>, Erika van Eijk<sup>1</sup>, Annemieke H. Friggen<sup>1</sup>, Christoph Weigel<sup>3</sup>,**  
5 **Wiep Klaas Smits<sup>1,2\*</sup>**

6 <sup>1</sup>Department of Medical Microbiology, Section Experimental Bacteriology, Leiden  
7 University Medical Center, Leiden, The Netherlands

8 <sup>2</sup>Center for Microbial Cell Biology, Leiden, The Netherlands

9 <sup>3</sup>Technische Universität Berlin, Institute of Biotechnology, Berlin, Germany

10

11 \* Correspondence: Wiep Klaas Smits, [w.k.smits@lumc.nl](mailto:w.k.smits@lumc.nl)

12

13 ORCID: AMOP: 0000-0002-6122-832X; EVE: 0000-0003-3003-9822; AHF: 0000-0001-  
14 5780-2053; WKS: 0000-0002-7409-2847

15

16 **Keywords:** *oriC*, *Clostridioides difficile*, DnaA, P1 nuclease

17     **Abstract**

18     Faithful DNA replication is crucial for viability of cells across all kingdoms of life.  
19     Targeting DNA replication is a viable strategy for inhibition of bacterial pathogens.  
20     *Clostridioides difficile* is an important enteropathogen that causes potentially fatal  
21     intestinal inflammation. Knowledge about DNA replication in this organism is limited  
22     and no data is available on the very first steps of DNA replication. Here, we use a  
23     combination of *in silico* predictions and *in vitro* experiments to demonstrate that *C.*  
24     *difficile* employs a bipartite origin of replication that shows DnaA-dependent melting at  
25     *oriC2*, located in the *dnaA-dnaN* intergenic region. Analysis of putative origins of  
26     replication in different clostridia suggests that the main features of the origin  
27     architecture are conserved. This study is the first to characterize aspects of the origin  
28     region of *C. difficile* and contributes to our understanding of the initiation of DNA  
29     replication in clostridia.

30

31

## 32 1. Introduction

33 *Clostridioides difficile* (formerly *Clostridium difficile*) (Lawson et al., 2016) is a Gram-  
34 positive anaerobic bacterium. *C. difficile* infections (CDI) can occur in individuals with a  
35 disturbed microbiota and is one of the main causes of hospital associated diarrhea, but  
36 can also be found in the environment (Smits et al., 2016). The incidence of CDI has  
37 increased worldwide since the beginning of the century (Smits et al., 2016; Warriner et  
38 al., 2017). Consequently, the interest in the physiology of the bacterium has increased  
39 in order to understand its interaction with the host and the environment and to  
40 explore news pathways for intervention (van Eijk et al., 2017; Crobach et al., 2018).

41 One such pathway is the replication of the chromosome. Overall, DNA replication is a  
42 highly conserved process across different kingdoms of life (O'Donnell et al., 2013;  
43 Bleichert et al., 2017). In all bacteria, DNA replication is a tightly regulated process that  
44 occurs with high fidelity and efficiency, and is essential for cell survival. The process  
45 involves many different proteins that are required for the replication process itself, or  
46 to regulate and aid replisome assembly and activity (Katayama et al., 2010; Murray and  
47 Koh, 2014; Chodavarapu and Kaguni, 2016; Jameson and Wilkinson, 2017; Schenk et  
48 al., 2017). Replication initiation and its regulation arguably are candidates for the  
49 search of novel therapeutic targets (Fossum et al., 2008; Grimwade and Leonard, 2017;  
50 van Eijk et al., 2017).

51 In most bacteria, replication of the chromosome starts with the assembly of the  
52 replisome at the origin of replication (*oriC*) and proceeds bidirectionally (Chodavarapu  
53 and Kaguni, 2016). In the majority of bacteria replication is initiated by the DnaA  
54 protein, an ATPase Associated with diverse cellular Activities (AAA+ protein) that binds  
55 specific sequences in the *oriC* region. The binding of DnaA induces DNA duplex  
56 unwinding, which subsequently drives the recruitment of other proteins, such as the  
57 replicative helicase, primase and DNA polymerase III proteins (Chodavarapu, 2016  
58 #974). Termination of replication eventually leads to disassembly of the replication  
59 complexes (Chodavarapu and Kaguni, 2016).

60 In *C. difficile*, knowledge on DNA replication is limited. Though many proteins appear  
61 to be conserved between well-characterized species and *C. difficile*, only certain  
62 replication proteins have been experimentally characterized for *C. difficile* (Torti et al.,  
63 2011; Briggs et al., 2012; van Eijk et al., 2016). DNA polymerase C (PolC, CD1305) of *C.*  
64 *difficile* has been studied in the context of drug-discovery and appears to have a  
65 conserved primary structure similar to other low-[G+C] gram-positive organisms (Torti  
66 et al., 2011). It is inhibited *in vitro* and *in vivo* by compounds that compete for binding  
67 with dGTP (van Eijk et al., 2019; Xu et al., 2019). Helicase (CD3657), essential for DNA  
68 duplex unwinding, was found to interact in an ATP-dependent manner with a helicase  
69 loader (CD3654) and loading was proposed to occur through a ring-maker mechanism  
70 (Davey and O'Donnell, 2003; van Eijk et al., 2016). However, in contrast to helicase of  
71 the Firmicute *Bacillus subtilis*, *C. difficile* helicase activity is dependent on activation by  
72 the primase protein (CD1454), as has also been described for *Helicobacter pylori* (Bazin  
73 et al., 2015; van Eijk et al., 2016). *C. difficile* helicase stimulates primase activity at the  
74 trinucleotide 5'-d(CTA), but not at the preferred trinucleotide 5'-d(CCC) (van Eijk et al.,  
75 2016).

76 DnaA of *C. difficile* has not been studied to date. Although no full-length structure has  
77 been determined for DnaA, individual domains of the DnaA protein from different  
78 organisms have been characterized (Majka et al., 1997; Zawilak et al., 2003; Erzberger  
79 et al., 2006; Zawilak-Pawlik et al., 2017). DnaA proteins generally comprise four  
80 domains (Zawilak-Pawlik et al., 2017). Domain I is involved in protein-protein  
81 interactions and is responsible for DnaA oligomerization (Weigel et al., 1999; Abe et  
82 al., 2007; Natrajan et al., 2009; Jameson et al., 2014; Kim et al., 2017; Zawilak-Pawlik et  
83 al., 2017; Martin et al., 2018; Matthews and Simmons, 2019; Nowaczyk-Cieszewska et  
84 al., 2019). Little is known about a specific function of domain II and this domain may  
85 even be absent (Erzberger et al., 2002). It is thought to be a flexible linker that  
86 promotes the proper conformation of the other DnaA domains (Abe et al., 2007;  
87 Nozaki and Ogawa, 2008). Domain III and Domain IV are responsible for the DNA  
88 binding. Domain III contains the AAA+ motif and is responsible for binding ATP, ADP  
89 and single-stranded DNA, as well as certain regulatory proteins (Kawakami et al., 2005;  
90 Cho et al., 2008; Ozaki et al., 2008; Ozaki and Katayama, 2012). Recent studies have  
91 also revealed the importance of this domain for binding phospholipids present in the  
92 bacterial membrane (Saxena et al., 2013). The C-terminal Domain IV contains a helix-  
93 turn-helix motif (HTH) and is responsible for the specific binding of DnaA to so called  
94 DnaA boxes (Blaesing et al., 2000; Erzberger et al., 2002; Fujikawa et al., 2003).

95 DnaA boxes are typically 9-mer non-palindromic DNA sequences, and the *E. coli* DnaA  
96 box consensus sequence is TTWTNCACA (Schaper and Messer, 1995; Wolanski et al.,  
97 2014). The boxes can differ in their affinity for DnaA, and even demonstrate different  
98 dependencies on the ATP co-factor (Speck et al., 1999; Patel et al., 2017). Binding of  
99 domain IV to the DnaA boxes promotes higher-order oligomerization of DnaA, forming  
100 a filament that wraps around DNA (Erzberger et al., 2006; Ozaki et al., 2012;  
101 Scholefield and Murray, 2013). It is thought that the interaction of the DnaA filament  
102 with the DNA helix introduces a bend in the DNA (Erzberger et al., 2006; Patel et al.,  
103 2017). The resulting superhelical torsion facilitates the melting of the adjacent A+T-rich  
104 DNA Unwinding Element (DUE) (Kowalski and Eddy, 1989; Erzberger et al., 2006;  
105 Zorman et al., 2012). Upon melting, the DUE provides the entry site for the replisome  
106 proteins. Another conserved structural motif, a triplet repeat called DnaA-trio, is  
107 involved in the stabilization of the unwound region (Richardson et al., 2016;  
108 Richardson et al., 2019).

109 The *oriC* region has been characterized for several bacterial species. These analyses  
110 show that *oriC* regions are quite diverse in sequence, length and even chromosomal  
111 location, all of which contribute to species-specific replication initiation requirements  
112 (Zawilak-Pawlik et al., 2005; Ekundayo and Bleichert, 2019). In Firmicutes, including *C.*  
113 *difficile*, the genomic context of the origin regions appears to be conserved and  
114 encompasses the *rnpA-rpmH-dnaA-dnaN* genes (Ogasawara and Yoshikawa, 1992;  
115 Briggs et al., 2012).

116 The *oriC* region can be continuous (i.e. located at a single chromosomal locus) or  
117 bipartite (Wolanski et al., 2014). Bipartite origins were initially identified in *B. subtilis*  
118 (Moriya et al., 1988) but more recently also in *H. pylori* (Donczew et al., 2012). The  
119 separate subregions of the bipartite origin, *oriC1* and *oriC2*, are usually separated by  
120 the *dnaA* gene. Both *oriC1* and *oriC2* contain clusters of DnaA boxes, and one of the

121 regions contains the major DUE region. The DnaA protein binds to both subregions and  
122 places them in close proximity to each other, consequently looping out the *dnaA* gene  
123 (Krause et al., 1997; Donczew et al., 2012). In *H. pylori*, DnaA domain I and II are  
124 important for maintaining the interactions between both *oriC* regions (Nowaczyk-  
125 Cieszewska et al., 2019).

126 In this study, we identified the putative *oriC* of *C. difficile* through *in silico* analysis and  
127 demonstrate DnaA-dependent unwinding of the *oriC2* region *in vitro*. A clear  
128 conservation of the origin of replication organization is observed throughout the  
129 clostridia. The present study contributes to our understanding of clostridial DNA  
130 replication initiation in general, and replication initiation of *C. difficile* specifically.

131

## 132 2. Materials and Methods

### 133 2.1 Sequence alignments and structure modelling

134 Multiple sequence alignment of amino acid sequences was performed with Protein  
135 BLAST (blastP suite, <https://blast.ncbi.nlm.nih.gov/Blast.cgi>) for individual alignment  
136 scores and the PRALINE program (<http://www.ibi.vu.nl/programs/pralinewww/>)  
137 (Bawono and Heringa, 2014) for multiple sequence alignment. Sequences were  
138 retrieved from the NCBI Reference Sequences. DnaA protein sequences from *C. difficile*  
139 630 $\Delta$ erm (CEJ96502.1), *C. acetobutylicum* DSM 1731 (AEI33799.1), *Bacillus subtilis* 168  
140 (NP\_387882.1), *Escherichia coli* K-12 (AMH32311.1), *Streptomyces coelicolor* A3(2)  
141 (TYP16779.1), *Mycobacterium tuberculosis* RGTB327 (AFE14996.1), *Helicobacter pylori*  
142 J99 (Q9ZJ96.1) and *Aquifex aeolicus* (WP\_010880157.1) were selected for alignment.  
143 Alignment was visualized in JalView version 2.11, with coloring by percentage identity.

144 Secondary structure prediction and homology modelling were performed using Phyre2  
145 (<http://www.sbg.bio.ic.ac.uk/phyre2>) (Kelley et al., 2015) using the intensive default  
146 settings. Phyre2 modelling of *C. difficile* 630 $\Delta$ erm DnaA (CEJ96502.1) was performed  
147 with 3 templates from *A. aeolicus* (PDB 2HCB, chain C), *B. subtilis* (PDB 4TPS, chain D)  
148 and *E. coli* (PDB 2E0G, chain A) and 21 residues were modelled *ab initio*. 95% of the  
149 residues were modelled with >90% confidence. Graphical representation was  
150 performed with the PyMOL Molecular Graphics System, Version 1.76.6. Schrödinger,  
151 LLC.

### 152 2.2 Prediction of the *C. difficile* *oriC*

153 To identify the *oriC* region of *C. difficile* the genome sequence of *C. difficile* 630 $\Delta$ erm  
154 (GenBank accession no. LN614756.1) was analyzed through different software in a  
155 stepwise procedure (Mackiewicz et al., 2004).

156 The GenSkew Java Application (<http://genskew.csb.univie.ac.at/>) was used with  
157 default settings for the analysis of the normal and the cumulative skew of two  
158 selectable nucleotides of the genomic nucleotide sequence ( $[G - C]/[G + C]$ ).  
159 Calculations were performed with a window size of 4293 bp and a step size of 4293  
160 bp. The inflection values of the cumulative GC skew plot are indicative of the  
161 chromosomal origin (*oriC*) and terminus of replication (*ter*).

162 Prediction of superhelicity-dependent helically unstable DNA stretches (SIDDs) was  
163 performed in the vicinity of the inflection point of the GC-skew plot, in 2.0 kb  
164 fragments comprising intergenic regions from nucleotide position 4291795 to 745  
165 (*oriC1*) and 466 to 2465 (*oriC2*) of the *C. difficile* 630 $\Delta$ erm chromosome. Prediction of  
166 the SIDDs in the different clostridia (Table 1) was performed in the vicinity of the  
167 inflection points of the GC-plot retrieved from Doric 10.0 database  
168 (<http://tubic.tju.edu.cn/doric/public/index.php>) (Luo and Gao, 2019), in 2.0 kb  
169 fragments comprising intergenic regions summarized in Table 1. The SIST program  
170 ([https://bitbucket.org/benhamlab/sist\\_codes/src/master/](https://bitbucket.org/benhamlab/sist_codes/src/master/)) (Zhabinskaya et al., 2015)  
171 was used to predicted free energies  $G(x)$  by running the melting transition algorithm  
172 only (SIDD) with default values (copolymeric energetics; default:  $\sigma = -0.06$ ;  $T = 37^\circ\text{C}$ ;  $x =$   
173  $0.01\text{M}$ ) and with superhelical density  $\sigma = -0.04$ .

174 We performed the identification of the DnaA box clusters by search of the motif  
175 TTWTNCACA with one mismatch (Supplementary information) in the leading strand on  
176 a 4432 bp sequence between the nucleotide position 4291488 to 2870 of the *C.*  
177 *difficile* 630 $\Delta$ erm chromosome, using Pattern Locator  
178 ([https://www.cmbi.uga.edu/downloads/programs/Pattern\\_Locator/patloc.c](https://www.cmbi.uga.edu/downloads/programs/Pattern_Locator/patloc.c)) (Mrazek  
179 and Xie, 2006). Identification of the DnaA boxes in the different clostridia (Table 1) was  
180 performed with the same pattern motif in the leading strand of the intergenic regions  
181 summarized on Table 1.

182 DnaA-trio sequences and ribosomal binding sites were manually predicted based on  
183 Richardson et al. (Richardson et al., 2016) and on Vellanoweth and Rabinowitz  
184 (Vellanoweth and Rabinowitz, 1992), respectively.

185 All output data was obtained as raw text files and further processed with Prism 8.3.1  
186 (GraphPad, Inc, La Jolla, CA) and CorelDRAW X7 (Corel).

### 187 **2.3 Strains and growth conditions**

188 *E. coli* strains were grown aerobically at 37°C in lysogeny broth (LB, Affymetrix)  
189 supplemented with 15  $\mu$ g/mL chloramphenicol or 50  $\mu$ g/mL kanamycin when required.  
190 *E. coli* strain DH5 $\alpha$  (Table 2) for DnaA containing plasmid and *E. coli* MC1061 strain  
191 (Table 2) was used to maintain the *oriC* containing plasmids. *E. coli* MS3898 strain,  
192 kindly provided by Alan Grossman (MIT, Cambridge, USA) (Table 2) was used for  
193 recombinant DnaA expression. *E. coli* transformation was performed using standard  
194 procedures (Sambrook et al., 1989). The growth was followed by monitoring the  
195 optical density at 600 nm (OD<sub>600</sub>).

### 196 **2.4 Construction of the plasmids**

197 For overexpression of DnaA, the *dnaA* nucleotide sequence (CEJ96502.1) from *C.*  
198 *difficile* 630 $\Delta$ erm (GenBank accession no. LN614756.1) was amplified by PCR from *C.*  
199 *difficile* 630 $\Delta$ erm genomic DNA using primers oEVE-7 and oEVE-21 (Table 3). The PCR  
200 product was subsequently digested with NcoI and BglII. The vector pAV13 (Smits et al.,  
201 2011) (Table 4), containing *B. subtilis dnaA* cloned in pQE60 (Qiagen) was kindly  
202 provided by Alan Grossman (MIT, Cambridge, USA) and was digested with the same  
203 enzymes and ligated to the digested fragment to yield vector pEVE40 (Table 4).

204 To construct a plasmid carrying the complete predicted *oriC*, the predicted *oriC* region  
205 (nucleotide 4292150 to 1593 from *C. difficile* 630 GenBank accession no. LN614756.1)  
206 was amplified by PCR from *C. difficile* 630 $\Delta$ erm genomic DNA using primers oAP40 and  
207 oAP41 (Table 3). The PCR product was subsequently digested with EcoRI and PstI and  
208 ligated into pori1ori2 (Table 4), kindly provided by Anna Zawilak-Pawlik (Hirszfeld  
209 Institute of Immunology and Experimental Therapy, PAS, Wroclaw, Poland), that was  
210 digested with the same enzymes, to yield vector pAP205 (Table 4).

211 For the cloning of the predicted *oriC1* region (nucleotide 4292150 to 24 of *C. difficile*  
212 630 $\Delta$ erm genomic DNA) the primer set oAP30/oAP31 (Table 3) was used. The  
213 amplified fragment was digested with EcoRI and PstI and inserted onto pori1ori2  
214 (Table 4) digested with same enzymes, yielding vector pAP83 (Table 4). For the cloning

215 of the predicted *oriC2* region (nucleotide 1291 to the 1593 of *C. difficile* 630 $\Delta$ *erm*  
216 genomic DNA) the primer set oAP32/oAP33 (Table 3) was used. The amplified  
217 fragment was digested with EcoRI and PstI and inserted onto pori1ori2 (Table 4)  
218 digested with same enzymes, yielding vector pAP76 (Table 4).

219 All DNA sequences introduced into the cloning vectors were verified by Sanger  
220 sequencing. For *oriC* containing vectors primers oAP56 and oAP57 (Table 3) were used  
221 for sequencing.

## 222 **2.5 Overproduction and purification of DnaA-6xHis**

223 Overexpression of DnaA-6xHis was carried out in *E. coli* strain CYB1002 (Table 2),  
224 harbouring the expression plasmid pEVE40 (Table 4). Cells were grown in 800 mL LB  
225 and induced with 1mM isopropyl- $\beta$ -D-1-thiogalactopyranoside (IPTG) at an OD<sub>600</sub> of 0.6  
226 for 3 hours. The cells were collected by centrifugation at 4°C and stored at -80°C. Cells  
227 were resuspended in Binding buffer (1X Phosphate buffer pH7.4, 10 mM Imidazol, 10%  
228 glycerol) lysed by French Press and collected in phenylmethylsulfonyl fluoride (PMSF)  
229 at 0.1 mM (end concentration). Separation of the soluble fraction was performed by  
230 centrifugation at 13000xg at 4°C for 20 min. Purification of the protein from the  
231 soluble fraction was done in Binding buffer on a 1 mL HisTrap Column (GE Healthcare)  
232 according to manufacturer's instructions. Elution was performed with Binding buffer in  
233 stepwise increasing concentrations of imidazole (20, 60, 100, 300 and 500 mM). DnaA-  
234 6xHis was mainly eluted at concentration of imidazole equal to or greater than  
235 300mM.

236 Fractions containing the DnaA-6xHis protein were pooled together and applied to  
237 Amicon Ultra Centrifugal Filters with 30 kDa cutoff (Millipore). Buffer was exchanged  
238 to Buffer A (25 mM HEPES-KOH pH 7.5, 100 mM K-glutamate, 5 mM Mg-acetate, 10%  
239 glycerol). The concentrated DnaA protein was subjected to size exclusion  
240 chromatography on an Äkta pure instrument (GE Healthcare). 200  $\mu$ L of concentrated  
241 DnaA-6xHis was applied to a Superdex 200 Increase 10/30 column (GE Healthcare) in  
242 buffer A at a flow rate of 0.5 ml min<sup>-1</sup>. UV detection was done at 280 nm. The column  
243 was calibrated with a mixture of proteins of known molecular weights (Mw):  
244 thyroglobulin (669 kDa), Apoferritin (443 kDa),  $\beta$ -amylase (200 kDa), Albumin (66 kDa)  
245 and Carbonic anhydrase (29 kDa). Eluted fractions containing DnaA-6xHis of the  
246 expected molecular weight (51 kDa) were quantified and visualized by Coomassie.  
247 Pure fractions were aliquoted and stored at -80°C for further experiments.

## 248 **2.6 Immunoblotting and detection**

249 For immunoblotting, proteins were separated on a 12% SDS-PAGE gel and transferred  
250 onto nitrocellulose membranes (Amersham), according to the manufacturer's  
251 instructions. The membranes were probed in PBST (PBS pH 7,4, 0,05% (v/v) Tween-20)  
252 with the mouse anti-his antibody (1:3000, Invitrogen) and the respective secondary  
253 antibody goat anti-mouse-HRP (1:3000, DAKO) were used. The membranes were  
254 visualized using the chemiluminescence detection kit Clarity ECL Western Blotting  
255 Substrates (Bio-Rad) in an Alliance Q9 Advanced machine (Uvitec).



256 **2.7 P1 nuclease Assay**

257 For the P1 nuclease assay, 100 ng pAP205 plasmid was incubated with increasing  
258 concentrations of DnaA-6xHis (0.14, 0.54, 1 and 6.3  $\mu$ M), when required, in P1 buffer  
259 (25mM HEPES-KOH (pH 7.6), 12% (v/v) glycerol, 1mM CaCl<sub>2</sub>, 0.2mM EDTA, 5mM ATP,  
260 0.1 mg/ml BSA), at 30°C for 12 min. 0.75 unit of P1 nuclease (Sigma), resuspended in  
261 0.01 M sodium acetate (pH 7.6) was added to the reaction and incubated at 30°C for 5  
262 min. 220  $\mu$ l of buffer PB (Qiagen) was added and the fragments purified with the  
263 miniElute PCR Purification Kit (Qiagen), according to manufacturer's instructions.  
264 Digestion with BglII, NotI or Scal (NEB) of the purified fragments was performed  
265 according to manufacturer's instructions for 1 hour at 37°C. Digested samples were  
266 resolved on 1% agarose gels in 0.5xTAE (40 mM Tris, 20 mM CH<sub>3</sub>COOH, 1 mM EDTA PH  
267 8.0) and stained with 0.01 mg/mL ethidium bromide solution afterwards. Visualization  
268 of the gels was performed on the Alliance Q9 Advanced machine (Uvitec). Images were  
269 processed in CorelDraw X7 software.

## 270 3. Results

### 271 3.1 *C. difficile* DnaA protein

272 *C. difficile* 630 $\Delta$ erm encodes a homolog of the bacterial replication initiator protein  
273 DnaA (GenBank: CEJ96502.1; CD630DERM\_00010). Alignment of the full-length *C.*  
274 *difficile* DnaA amino acid sequence with selected DnaA homologs from other  
275 organisms demonstrates a sequence identity of 35% to 67%, with an even higher  
276 similarity (57% to 83%, Fig. 1A). *C. difficile* DnaA displays a greater sequence identity  
277 between the low-[G+C] Firmicutes (> 60%). When compared with the extensively  
278 studied DnaA proteins from *E. coli* and *B. subtilis*, the full-length protein has 43% and  
279 62% identity, and a similarity of 63% and 78%, respectively (Fig. 1A).

280 To assess the structural properties of *C. difficile* DnaA, we predicted the secondary  
281 structure and generated a model of the protein using Phyre2 (Kelley et al., 2015) (Fig.  
282 1B). The predicted DnaA model is based on three DnaA structures from different  
283 organisms: *A. aeolicus* (residues 101 to 318 and 334 to 437)(Erzberger et al., 2006) for  
284 domain III and IV, and *B. subtilis* (residues 2 to 79) (Jameson et al., 2014) and *E. coli*  
285 (residues 5 to 97) (Abe et al., 2007) for domain I and II.

286 Domain I of DnaA mediates interactions with a diverse set of regulators, and is  
287 involved in DnaA oligomerization (Zawilak-Pawlik et al., 2017; Nowaczyk-Cieszewska et  
288 al., 2019). We observe limited homology of *C. difficile* DnaA domain I with the  
289 equivalent domain of the selected organisms (Fig. 1A), although the overall fold is  
290 clearly conserved (Fig. 1B). Nevertheless, some residues (P45, F48) appear to be  
291 conserved in most of the selected organisms (Fig. 1A).

292 Domain II is a flexible linker that is possibly involved in aiding the proper conformation  
293 of the DnaA domains, and thus requires a minimal length for DnaA function *in vivo*  
294 (Nozaki and Ogawa, 2008). No clear sequence similarity is observed on domain II and  
295 modelling of the *C. difficile* DnaA protein suggests a putative disordered nature of this  
296 domain (Fig. 1).

297 Domain III is responsible for binding to the co-factors ATP and ADP, and in conjunction  
298 with domain IV essential for DNA binding (Kawakami et al., 2005; Ozaki et al., 2008;  
299 Ozaki and Katayama, 2012). Within domain III we readily identified the Walker A and  
300 Walker B motifs (WA and WB in Fig. 1A) of the AAA+ fold (residues 135-317), crucial for  
301 binding and hydrolyzing ATP. This domain is highly conserved among all the selected  
302 organisms (Fig. 1A) and comprises a structural center of  $\beta$ -sheets (Fig. 1B, pink  
303 domain). Other features of the AAA+ ATPase fold are present and conserved between  
304 the organisms, such as the sensor I and sensor II motifs required for the nucleotide  
305 binding (I and II, Fig.1A). The arginine finger motif (the equivalent of R285 of *E. coli*  
306 DnaA in the VII box), important for the ATP dependent activation of DnaA (Kawakami  
307 et al., 2005), is conserved in *C. difficile* DnaA as well (R256 in motif box VII; Fig. 1A).

308 The C-terminal domain IV of the DnaA protein (residues 317 to 439, Fig. 1A), contains  
309 the HTH motif required for the specific binding to DnaA-boxes (Erzberger et al., 2002;  
310 Zawilak et al., 2003). Previous studies identified several residues involved in specific  
311 interactions with the DnaA boxes, that bind through hydrogen bonds and van der

312 Waals contacts with thymines present in the DNA sequence (Blaesing et al., 2000;  
313 Fujikawa et al., 2003; Tsodikov and Biswas, 2011). The residues are conserved among  
314 all Firmicutes and *E. coli*, including the residues R371 (position R399 in *E. coli*), P395  
315 (P423), D405 (D433), H406 (H434), T407 (T435), and H411 (H439), (Fig. 1B inset, red  
316 residues) (Fujikawa et al., 2003). Structural modeling of *C. difficile* DnaA predicts these  
317 residues to be exposed, providing an interface for DNA binding (Fig. 1B). Several  
318 residues were found to be involved in non-specific interactions with the phosphate  
319 backbone of the DNA, including some of the residues that confer the specificity  
320 (Fujikawa et al., 2003; Tsodikov and Biswas, 2011). These contacting residues appear  
321 less conserved between the selected organisms (Fig. 1A). Nevertheless, the residues for  
322 specific base recognition are conserved between the Firmicutes and *E. coli*, suggesting  
323 that *C. difficile* DnaA is likely to recognize the consensus DnaA box TTWTNCACA  
324 (Schaper and Messer, 1995).

### 325 **3.2 Expression and purification of DnaA-6xHis**

326 To allow for *in vitro* characterization of DnaA activity, we recombinantly expressed the  
327 *C. difficile* DnaA with a C-terminal 6xHis-tag in *E. coli* cells. To prevent the co-  
328 purification of *C. difficile* DnaA with host DnaA protein, *E. coli* strain CYB1002 was used  
329 (a kind gift of A.D. Grossman). This strain is a derivative of *E. coli* MS3898, that lacks  
330 the *dnaA* gene and replicates in a DnaA-independent fashion (Sutton and Kaguni,  
331 1997). Induction of the DnaA-6xHis protein was confirmed by Coomassie staining and  
332 immunoblotting with anti-his antibody at the expected molecular weight of 51 kDa  
333 (Fig. 2A, red arrow). Upon overexpression of DnaA-6xHis, smaller fragments were  
334 observed, which accumulated with a prolonged time of expression (Fig. 2A), most likely  
335 corresponding to proteolytic fragments of the DnaA-6xHis protein.

336 Purification of the recombinant DnaA-6xHis showed a clear band at the expected size  
337 when eluted at 300 mM imidazole concentration, but several lower molecular size  
338 bands were observed (Fig. S1). Therefore, the eluted fractions were further purified  
339 with size exclusion chromatography (SEC). This yielded a single product at the  
340 expected molecular weight of DnaA-6xHis, and its identity was confirmed by western-  
341 blot with anti-his antibody (Fig. 2B, red arrow). A minor band of lower molecular  
342 weight (approximately 38 kDa, <1% of total protein) was observed (Fig. 2B, green  
343 asterisk), which may reflect some instability of the N-terminus of the DnaA-6xHis  
344 protein, as it appears to have retained the C-terminal 6xHis tag.

### 345 **3.3 *In silico* prediction of the *oriC* region**

346 To identify the *oriC* region and the elements that are part of it (DUE, DnaA-trio and  
347 DnaA boxes) we performed different prediction approaches in a stepwise procedure,  
348 as initially described (Mackiewicz et al., 2004).

349 We first analyzed the DNA asymmetry of the genome of *C. difficile* 630 $\Delta$ *erm* (GenBank  
350 accession no. LN614756.1) (van Eijk et al., 2015), by plotting the normalized difference  
351 of the complementary nucleotides (GC-skew plot) (Necsulea and Lobry, 2007). *C.*  
352 *difficile* 630 $\Delta$ *erm* has a circular genome of 4293049 bp and an average G+C content of  
353 29.1%. We used the GenSkew Java Application (<http://genskew.csb.univie.ac.at/>) for

354 determining the chromosomal asymmetry. Asymmetry changes in a GC-skew plot can  
355 be used to predict the origin of replication region and the terminus region of bacterial  
356 genomes. Based on this analysis, the origin is predicted at approximately position 1 of  
357 the chromosome. The terminus location is predicted at approximately 2.18 Mbp from  
358 the origin region (Fig. 3A). These results were confirmed when artificially reassigning  
359 the starting position of the chromosomal assembly (data not shown). The gene  
360 organization in the putative origin region is *rnpA-rpmH-dnaA-dnaN* (position 4291488  
361 to 2870, Fig. 3B), identical to the origin of *B. subtilis* (Ogasawara et al., 1985; Briggs et  
362 al., 2012), and therefore encompasses the *dnaA* gene (CD630DERM\_00010, Fig. 3B)  
363 (Ogasawara et al., 1985; Briggs et al., 2012).

364 We next used the SIST program (Zhabinskaya et al., 2015) to localize putative DUEs in  
365 the intergenic regions in the chromosomal region predicted to contain the *oriC*.  
366 Hereafter we refer to these regions as *oriC1* (in the intergenic region of *rpmH-dnaA*)  
367 and *oriC2* (in the intergenic region *dnaA-dnaN*), in line with nomenclature in other  
368 organisms (Ogasawara et al., 1985; Donczew et al., 2012) (Fig. 3B). SIST identifies  
369 helically unstable AT-rich DNA stretches (Stress-Induced Duplex Destabilization  
370 regions; SIDDs) (Donczew et al., 2012; Zhabinskaya et al., 2015). In regions with a lower  
371 free energy ( $G_{(x)} < y$  kcal/mol) the double-stranded helix has a high probability to  
372 become single-stranded DNA. With increasing negative superhelicity ( $\sigma = -0.06$ , Fig.  
373 3C, green line) regions of both *oriC1* and *oriC2* become single stranded DNA ( $G_{(x)} < 2$   
374 kcal/mol). At low negative superhelicity ( $\sigma = -0.04$ , Fig. 3C, red line) short stretches of  
375 DNA of approximately 27 bp were identified with a significantly lower free energy.  
376 These regions with lower free energy at a negative superhelicity of  $-0.04$  and  $-0.06$  are  
377 potential DUE sites. The nucleotide sequence of the possible unwinding elements  
378 identified are represented in detail in Fig. 4 (grey boxes).

379 We then performed the identification of DnaA box clusters through a search of the  
380 consensus DnaA box TTWTNCACA containing up to one mismatch, using Pattern  
381 Locator (Mrazek and Xie, 2006). 22 putative DnaA boxes were identified in both the  
382 leading and lagging strain in the predicted *C. difficile* *oriC* regions (Fig. 4, pink boxes),  
383 14 in the *oriC1* region and 8 in the *oriC2* region. Both the consensus DnaA box  
384 TTWTNCACA and variant boxes are found. A cluster of DnaA boxes was proposed to  
385 contain at least three boxes with an average distance lower than 100 bp in between  
386 (Mackiewicz et al., 2004). At least one such cluster can be found in each origin region  
387 (Fig. 4).

388 We also manually identified the putative ribosomal binding sites for the annotated  
389 genes (Fig. 4, dashed line).

390 Finally, we manually predicted DnaA-trio sequences ( $3'-[G/A]A[T/A]_{n>3}-5'$  preceded by  
391 a GC-cluster) in the predicted *oriC* regions, as this motif is required for successful  
392 replication in both *E. coli* and *B. subtilis* (Richardson et al., 2016; Katayama et al.,  
393 2017). We identified a clear DnaA-trio in the lagging strand upstream of a predicted  
394 DUE region in the *oriC2* region, with the nucleotide sequence 5'-  
395 CACCTACTACTATTACTACTATGA-3' (Fig. 4, light blue box), but no clear DnaA-trio was  
396 identified in the *oriC1* region.

397 From all the observations, we anticipate that a bipartite origin is located in the *dnaA*  
398 chromosomal region of *C. difficile* with unwinding occurring downstream of *dnaA*, at  
399 the *oriC2* region.

### 400 **3.4 DnaA-dependent unwinding**

401 To localize DnaA-dependent unwinding of *oriC*, we used the purified *C. difficile* DnaA-  
402 6xHis protein and the predicted *oriC* sequence, to perform P1 nuclease assays as  
403 previously described (Sekimizu et al., 1988; Donczew et al., 2012). Localized melting  
404 resulting from DnaA activity exposes ssDNA to the action of the ssDNA-specific P1  
405 nuclease. After incubation of a vector containing the *oriC* fragment with DnaA protein  
406 and cleavage by the P1 nuclease, the vector is purified and digested with different  
407 endonucleases to map the location of the unwound region.

408 We constructed vectors, based on *pori1ori2* (Donczew et al., 2012), harboring *C.*  
409 *difficile oriC1* (pAP76) or *oriC2* (pAP83) individually, as well as the complete *oriC* region  
410 (pAP205) (Fig. 5A and S2A). For a more accurate determination of the unwound region,  
411 the vectors were subjected to digestion by three different restriction enzymes (BglII,  
412 NotI, Scal), resulting in different restriction patterns. Limited spontaneous unwinding  
413 of the plasmid was observed in the *C. difficile oriC*-containing vectors (Fig. 5A and S2B).  
414 No DnaA-dependent change in restriction pattern was observed when using the single  
415 *oriC* regions (Fig. S2B), suggesting *oriC1* and *oriC2* individually lack the requirements  
416 for DnaA-dependent unwinding.

417 We did observe a DnaA-dependent change in digestion patterns for the *oriC1oriC2*-  
418 containing vector pAP205 (Fig 5). Digestion of this vector with BglII in the absence of  
419 DnaA-6xHis and P1 nuclease resulted in a linear DNA fragment (4638 bp) due the  
420 presence of a unique BglII restriction site (Fig. 5B, first lane, upper panel). The addition  
421 of P1 nuclease leads to the appearance of a faint band between 1650 and 3000 bp (Fig.  
422 5B), consistent with previous observations that the presence of a plasmid DUE can  
423 result in low-level spontaneous unwinding due to the inherent instability of these AT-  
424 rich regions (Jaworski et al., 2016). Upon the addition of the DnaA-6xHis protein the  
425 observed band becomes more intense, suggesting a strong increase in unwinding (Fig.  
426 5B, upper panel, red arrow).

427 Digestion of pAP205 with NotI in the absence of DnaA-6xHis and P1 nuclease results in  
428 fragments of 3804 and 842 bp, due to two NotI recognition sites in the vector (Fig 5B,  
429 1<sup>st</sup> lane, middle panel). In the presence of just P1 nuclease, a similar low level of  
430 spontaneous unwinding is observed, resulting in the appearance of two additional  
431 faint bands, one between 1650 and 3000 bp and other between 1000 and 1650 bp  
432 (Fig. 5B). The addition of DnaA-6xHis results in an increase in intensity of both these  
433 bands in a dose dependent manner (Fig. 5A, middle panel, red arrows).

434 The Scal digestions of pAP205 show a complex pattern, which we attribute to partially  
435 incomplete digestion under the conditions used, and which we have not been able to  
436 fully resolve. The most relevant observation is a clearly visible band of between 650  
437 and 850 bp in the presence of both P1 and DnaA-6xHis (Fig. 5A, lower panel, red  
438 arrow). We do not observe spontaneous unwinding in the presence of only P1

439 nuclease, although the pattern is distinct from that of the control lane (Fig 5B, first  
440 lane, lower panel).

441 The DnaA-dependent appearance of the ~2000 bp band in the BglII digest, the ~1200  
442 and ~2200bp bands in the NotI digest, and the ~700 bp band in the Scal digest localize  
443 the DnaA-dependent unwinding of the *C. difficile* *oriC* in the *oriC2* region (Fig. 5B, gray  
444 rectangle, DUE). Moreover, these results suggest that *C. difficile* has a bipartite origin  
445 of replication, as successful DnaA-dependent unwinding of *C. difficile* in the *oriC2*  
446 region requires both *oriC* regions (*oriC1* and *oriC2*).

### 447 **3.5 Conservation of the origin organisation in related Clostridia**

448 Our results suggest that the origin organization of *C. difficile* resembles that of a more  
449 distantly related Firmicute, *B. subtilis*. To extend our observations, we evaluated the  
450 genomic organization of the *oriC* region in different organisms phylogenetically related  
451 to *C. difficile*. We followed a similar approach as described above for *C. difficile*  
452 630 $\Delta$ *erm*, taking advantage of the DoriC 10.0 database  
453 (<http://tubic.tju.edu.cn/doric/public/index.php>) (Luo and Gao, 2019). Importantly, our  
454 results with respect to the *C. difficile* origin of replication described above were largely  
455 congruent with the DoriC 10.0 database (data not shown). We retrieved the predicted  
456 *oriC* regions from the DoriC 10.0 database and performed an in-depth analysis of these  
457 regions for the closely related *C. difficile* strain R20291 (NC\_013316.1), as well as the  
458 more distantly related *C. botulinum* A Hall (NC\_009698.1), *C. sordelli* AM370  
459 (NZ\_CP014150), *C. acetobutylicum* DSM 1731 (NC\_015687.1), *C. perfringens* str.13  
460 (NC\_003366.1) and *C. tetani* E88 (NC\_004557.1) (Table 1).

461 Similar to *C. difficile* 630 $\Delta$ *erm*, the genomic context of the origin contains the *rpmH*-  
462 *dnaA-dnaN* region for most of the clostridia selected and mirrors that of *B. subtilis*  
463 (Fig.6). The only exception is *C. tetani* E88 where the uncharacterized CLOTE0041 gene  
464 lies upstream of the *dnaA-dnaN* cluster (Fig.6).

465 We also identified the possible DnaA boxes for the selected clostridia (Fig. 6, pink semi-  
466 circle). Across the analyzed clostridia, *oriC1* region presented more variability in the  
467 number of putative DnaA boxes, from 9 to 19, whereas *oriC2* contained 5 to 9 DnaA  
468 boxes, with *C. tetani* E88 with the lowest number of possible DnaA boxes, both at the  
469 *oriC1* (9 boxes) and *oriC2* (5 boxes) regions (Fig. 6, pink semi-circle). In all the  
470 organisms we observe at least 1 DnaA cluster in each origin region, as also observed  
471 for *C. difficile* 630 $\Delta$ *erm*.

472 Prediction of DUEs using the SIST program (Zhabinskaya et al., 2015) identified several  
473 helically unstable regions that are candidate sites for unwinding (Fig. 6, dashed lines,  
474 and Fig. S3). Notably, in all cases one such region in *oriC2* (Fig. 6, grey circle) is  
475 preceded immediately by the manually identified DnaA-trio (Fig. 6, light blue circle).  
476 Based on our experimental data for *C. difficile* 630 $\Delta$ *erm*, we suggest that in all analyzed  
477 clostridia, DnaA-dependent unwinding occurs at a conserved DUE downstream of the  
478 DnaA-trio in the *oriC2* region (Fig. 6).

#### 479 4. Discussion

480 Chromosomal replication is an essential process for the survival of the cell. In most  
481 bacteria DnaA protein is the initiator protein for replication and through a cascade of  
482 events leads to the successful loading of the replication complex onto the origin of  
483 replication (Mott and Berger, 2007).

484 Initial characterization of bacterial replication has been assessed in the model  
485 organisms *E. coli* and *B. subtilis* (Jameson and Wilkinson, 2017). Despite the similarities  
486 the structure of the replication origins and the regulation mechanisms are variable  
487 among bacteria (Wolanski et al., 2014). In contrast to *E. coli*, *B. subtilis* origin region is  
488 bipartite, with two intergenic regions upstream and downstream the *dnaA* gene. In *C.*  
489 *difficile* the genomic organization in the predicted cluster *rnpA-rpmH-dnaA-dnaN*, and  
490 the presence of AT-rich sequences in the intergenic regions is consistent with a  
491 bipartite origin, as in *B. subtilis* (Fig. 3).

492 The origin region contains several DnaA-boxes with different properties that are  
493 recognized by the DnaA protein. The specific binding of DnaA to the DnaA-boxes is  
494 mediated mainly through domain IV of the DnaA protein. From DNA bound structures  
495 of DnaA it was possible to identify several residues involved in the contact with the  
496 DnaA boxes, some of which confer specificity (Blaesing et al., 2000; Fujikawa et al.,  
497 2003; Tsodikov and Biswas, 2011). Analysis of the of *C. difficile* DnaA homology in  
498 domain IV did not show any difference in the residues involved on the DnaA-box  
499 specificity (Fig.1, vertical arrows), suggesting the same consensus motif conservation  
500 as the DnaA-box TTWTNCACA for *E.coli* (Schaper and Messer, 1995). The conserved  
501 DnaA-box motif allowed us to identify several DnaA boxes along the intergenic regions  
502 of the *oriC*. Like in the bipartite origin of *B. subtilis*, we identified at least one cluster of  
503 DnaA-boxes in the *C. difficile oriC*, present at the *oriC1* and the in *oriC2* regions (Fig.4  
504 and 6). However accurate determination of the *C. difficile* DnaA-boxes was not  
505 resolved and further footprinting assays could provide insights on the DnaA-box  
506 conservation and affinities. Moreover, it remains to be determined whether the DnaA  
507 boxes are crucial for origin firing and/or transcriptional regulation.

508 The P1 nuclease assays place a region in which DnaA-dependent unwinding occurs in  
509 the *oriC2* region of *C. difficile*, supported by the presence of the several features on the  
510 *oriC2*, such as the identified DUE and DnaA-trio, both required for unwinding (Kowalski  
511 and Eddy, 1989; Richardson et al., 2016). The presence of both *oriC* regions (*oriC1* and  
512 *oriC2*) is required for melting *in vitro*, as observed for other bipartite origins (Wolanski  
513 et al., 2014). In contrast to the bipartite origin identified in *H. pylori* (Donczew et al.,  
514 2012), we did not observe unwinding of the *oriC2* region alone. Though this may be a  
515 specific aspect of *C. difficile oriC2*, we cannot exclude that differences in the  
516 experimental setup (e.g. DnaA protein purification) could affect these observations.  
517 Nevertheless, our data are consistent with DnaA binding the DnaA-box clusters in both  
518 *oriC* regions, leading to potential DnaA oligomerization, loop formation, and unwinding  
519 at the AT-rich DUE site.

520 When analyzing the origin region between different clostridia, features similar to those  
521 of *C. difficile* are observed, such as conservation of DnaA-box clusters within both *oriC*

522 regions in the vicinity of the *dnaA* gene. Similar to *C. difficile* and *B. subtilis*, a putative  
523 DUE element, preceded by the DnaA-trio, was also located within the *oriC2* region  
524 (Fig.4 and 6). Thus, the overall origin organization and mechanism of DNA replication  
525 initiation is likely to be conserved within the Firmicutes (Briggs et al., 2012). As spacing  
526 of the DnaA-boxes are determinants for the species-specific effective replication  
527 (Zawilak et al., 2003; Zawilak-Pawlik et al., 2005), these similarities do not exclude the  
528 possibilities that subtle differences in replication initiation exist, and further studies  
529 are required.

530 Additionally, several proteins can interact with the *oriC* region or DnaA, including YabA,  
531 Rok, DnaD/DnaB, Soj and HU (Briggs et al., 2012; Jameson and Wilkinson, 2017). In  
532 doing so they shape the origin conformation and/or stabilize the DnaA filament or the  
533 unwound region, consequently affecting replication initiation.

534 YabA or Rok affect *B. subtilis* replication initiation (Goranov et al., 2009; Schenk et al.,  
535 2017; Seid et al., 2017), but no homologs of these proteins have been identified in *C.*  
536 *difficile*. In *B. subtilis*, DnaD, DnaB and DnaI helicase loader proteins associate  
537 sequentially with the origin region resulting in the recruitment of the DnaC helicase  
538 protein (Marsin et al., 2001; Velten et al., 2003; Smits et al., 2010; Jameson and  
539 Wilkinson, 2017). In *B. subtilis*, DnaD binds to DnaA and it is postulated that this affects  
540 the stability of the DnaA filament and consequently the unwinding of the *oriC* (Ishigo-  
541 Oka et al., 2001; Martin et al., 2018; Matthews and Simmons, 2019). *B. subtilis* DnaB  
542 protein also affects the DNA topology and has been shown to be important for  
543 recruiting *oriC* to the membrane (Rokop et al., 2004; Zhang et al., 2005). *C. difficile*  
544 lacks a homologue for the DnaB protein, although the closest homolog of the DnaD  
545 protein (CD3653) (van Eijk et al., 2017) may perform similar functions in the origin  
546 remodeling (van Eijk et al., 2016). Direct interaction of DnaA-DnaD through the DnaA  
547 domain I was structurally determined and the residues present at the interface were  
548 solved (Martin et al., 2018). Despite high variability of this domain between organisms,  
549 half of the identified contacts for the DnaA-DnaD interaction are conserved within *C.*  
550 *difficile*, the S22 (S23 in *B. subtilis* DnaA), T25 (T26), F48 (F49), D51 (D52) and L68 (L69)  
551 (Fig.1) (Martin et al., 2018; Matthews and Simmons, 2019). This might suggest a similar  
552 interaction surface for CD3653 on *C. difficile* DnaA. A characterization of the putative  
553 interaction between CD3653 and DnaA, and the resulting effect on DnaA  
554 oligomerization and origin melting awaits purification and functional characterization  
555 of CD3653. The Soj protein, also involved in chromosome segregation, has been shown  
556 to interact with DnaA via domain III, regulating DnaA-filament formation (Scholefield  
557 et al., 2012) and *C. difficile* encodes at least one uncharacterized Soj homolog.  
558 Bacterial histone-like proteins (such as HU and HBSu) can modulate DNA topology and  
559 have been shown the influence on *oriC* unwinding and replication initiation in other  
560 organisms (Krause et al., 1997; Chodavarapu et al., 2008). *C. difficile* encodes a  
561 homologue of HU, HupA (Oliveira Paiva et al., 2019). Though the role of Soj and HupA  
562 in DNA replication remains to be elucidated, our experiments show they are not  
563 strictly required for origin unwinding. Finally, Spo0A, the master regulator of  
564 sporulation, binds to several Spo0A-boxes present in this the *oriC* region in *B. subtilis*  
565 (Boonstra et al., 2013). Some of the Spo0A-boxes partially overlap with DnaA-boxes  
566 and binding of Spo0A can prevent the DnaA-mediated unwinding, thus playing a  
567 significant role on the coordination of between cell replication and sporulation



568 (Boonstra et al., 2013). In *C. difficile*, Spo0A-binding has previously been investigated  
569 (Rosenbusch et al., 2012), but a role in DNA replication has not been assessed. For all  
570 the regulators with a *C. difficile* homolog discussed above (i.e. CD3653, Soj, HupA and  
571 Spo0A), further studies can be envisioned employing the P1 nuclease assays described  
572 here to assess the effects on DnaA-mediated unwinding of the origin.

573 In summary, through a combination of different *in silico* predictions and *in vitro*  
574 studies, we have shown DnaA-dependent unwinding in the *dnaA-dnaN* intergenic  
575 region of the bipartite *C. difficile* origin of replication. We have analysed the putative  
576 origin of replication in different clostridia and observed a conserved organization  
577 throughout the Firmicutes, although different mechanisms and modes of regulation  
578 might drive the initiation of replication. The present study is the first to characterize  
579 the origin region of *C. difficile* and form the start to further unravel the mechanism  
580 behind the DnaA-dependent regulation of *C. difficile* initiation of replication.

581

582 **Conflict of interest**

583 The authors declare that the research was conducted in the absence of any  
584 commercial or financial relationships that could be construed as a potential conflict of  
585 interest.

586 **Author contributions**

587 AMOP and WKS designed experiments. AMOP and CW performed the *in silico*  
588 analyses. AMOP, EVE and AF performed experiments. AMOP and WKS analysed data  
589 and wrote the manuscript. All authors read and approved the final version for  
590 submission.

591 **Funding**

592 Work in the group of WKS was supported by a Vidi Fellowship (864.10.003) of the  
593 Netherlands Organization for Scientific Research (NWO) and a Gisela Thier Fellowship  
594 from the Leiden University Medical Center.

595 **Acknowledgments**

596 We thank Alan Grossman for kindly providing the pAV13 vector and *E. coli* strain  
597 CYB1002. We thank Anna Zawilak-Pawlik for kindly providing the pori1ori2 vector and  
598 expert help in setting up the P1 assays. We also thank Luís Sousa for help with the SIDD  
599 and Pattern Locator coding files.

600

601 **Table 1.** Clostridia intergenic regions used for SIDD analysis.

| Clostridia (GenBank accession no.)              | <i>oriC1</i> * <sup>1</sup>    | <i>oriC2</i>                  |
|-------------------------------------------------|--------------------------------|-------------------------------|
|                                                 | <i>DoriC ID</i> * <sup>2</sup> | <i>DoriC ID</i> *             |
| <i>C. difficile</i> R20291 (NC_013316.1)        | 4189900 to 561<br>ORI93010593  | 780 to 2780<br>ORI93010592    |
| <i>C. botulinum</i> A Hall (NC_009698.1)        | 3759361 to 800<br>ORI92010336  | 510 to 2510<br>ORI92010335    |
| <i>C. sordelli</i> AM370 (NZ_CP014150)          | 3549121 to 662<br>ORI97012279  | 561 to 2561<br>ORI97012278    |
| <i>C. acetobutylicum</i> DSM 1731 (NC_015687.1) | 3941422 to 961<br>ORI94010884  | 1040 to 3040<br>ORI94010883   |
| <i>C. perfringens</i> str.13 (NC_003366.1)      | 3030241 to 810<br>ORI10010054  | 881 to 2881<br>ORI10010053    |
| <i>C. tetani</i> E88 (NC_004557.1)              | 52001 to 54000<br>ORI10010089  | 50081 to 52081<br>ORI10010088 |

602 \*<sup>1</sup> 2.0 kb fragments selected for SIDD analysis comprising the intergenic regions

603 \*<sup>2</sup> DoriC 10.0 intergenic regions from <http://tubic.tju.edu.cn/doric/public/index.php>

604

605

606 **Table 2.** *E. coli* strains used in this study.

| Name         | Relevant Genotype/Phenotype*                                                                                                                            | Origin                |
|--------------|---------------------------------------------------------------------------------------------------------------------------------------------------------|-----------------------|
| DH5 $\alpha$ | F– endA1 glnV44 thi-1 recA1 relA1 gyrA96 deoR nupG purB20 $\phi$ 80dlacZ $\Delta$ M15 $\Delta$ (lacZYA-argF)U169, hsdR17(rK–mK+), $\lambda$ –           | Laboratory collection |
| MC1061       | str. K-12 F– $\lambda$ – $\Delta$ (ara-leu)7697 [araD139]B/r $\Delta$ (codB-lacI)3 galK16 galE15 e14– mcrA0 relA1 rpsL150(StrR) spoT1 mcrB1 hsdR2(r–m+) | Laboratory Collection |
| CYB1002      | $\Delta$ dnaA zia::pKN500(miniR1) asnB32 relA1 spoT1 thi-1 ilv192 mad1 recA1 $\lambda$ imm434 F- pBB42 (lacI; TetR)                                     | Grossman lab          |

607

608 **Table 3.** Oligonucleotides used in this study.

| Name    | Sequence (5'>3') *                            |
|---------|-----------------------------------------------|
| oEVE-7  | CAGTCCATGGATATAGTTTCTTTATGGGACAAAACC          |
| oEVE-21 | CGGCAGATCTTCCCTTCAAATCTGATATAATTTTGTCTATTTTAG |
| oAP30   | AATTGAATTCTTTGTCCATAAAGAACTATATCC             |
| oAP31   | TGGGCTGCAGTTC AACCTTTAGTCCTATTAAGTCC          |
| oAP32   | AATTGAATTCTTTGCTAGGATTTTTTGATTAC              |
| oAP33   | TGGGCTGCAGTTGACAAAATTATATCAGATTTG             |
| oAP40   | TGGGCTGCAGTTGCTAGGATTTTTTGATTAC               |
| oAP41   | AATTGAATTCTTTCAACCCTTTAGTCCTATTAAGTCC         |
| oAP56   | CAGCGAGTCAGTGAGCGAGGAAG                       |
| oAP57   | GATTGATTTAATTCTCATGTTTGAC                     |

609 \* Restriction enzyme cleavage sites used underlined

610 **Table 4.** Plasmids used in this study.

| <b>Name</b> | <b>Relevant features*</b>                                        | <b>Source/Reference</b>       |
|-------------|------------------------------------------------------------------|-------------------------------|
| pAV13       | lacI <sup>q</sup> , P <sub>T5</sub> expression vector; <i>km</i> | (Smits, Merrikh et al. 2011)  |
| pEVE40      | P <sub>T5</sub> - DnaA-6xHis; <i>km</i>                          | This study                    |
| pori1ori2   | <i>H. pylori oriC1oriC2; amp</i>                                 | (Donczew, Weigel et al. 2012) |
| pAP76       | <i>C. difficile oriC2; amp</i>                                   | This study                    |
| pAP83       | <i>C. difficile oriC1; amp</i>                                   | This study                    |
| pAP205      | <i>C. difficile oriC1oriC2; amp</i>                              | This study                    |

611 \* *amp* – ampicillin resistance cassette, *km* – kanamycin resistance cassette

**A**

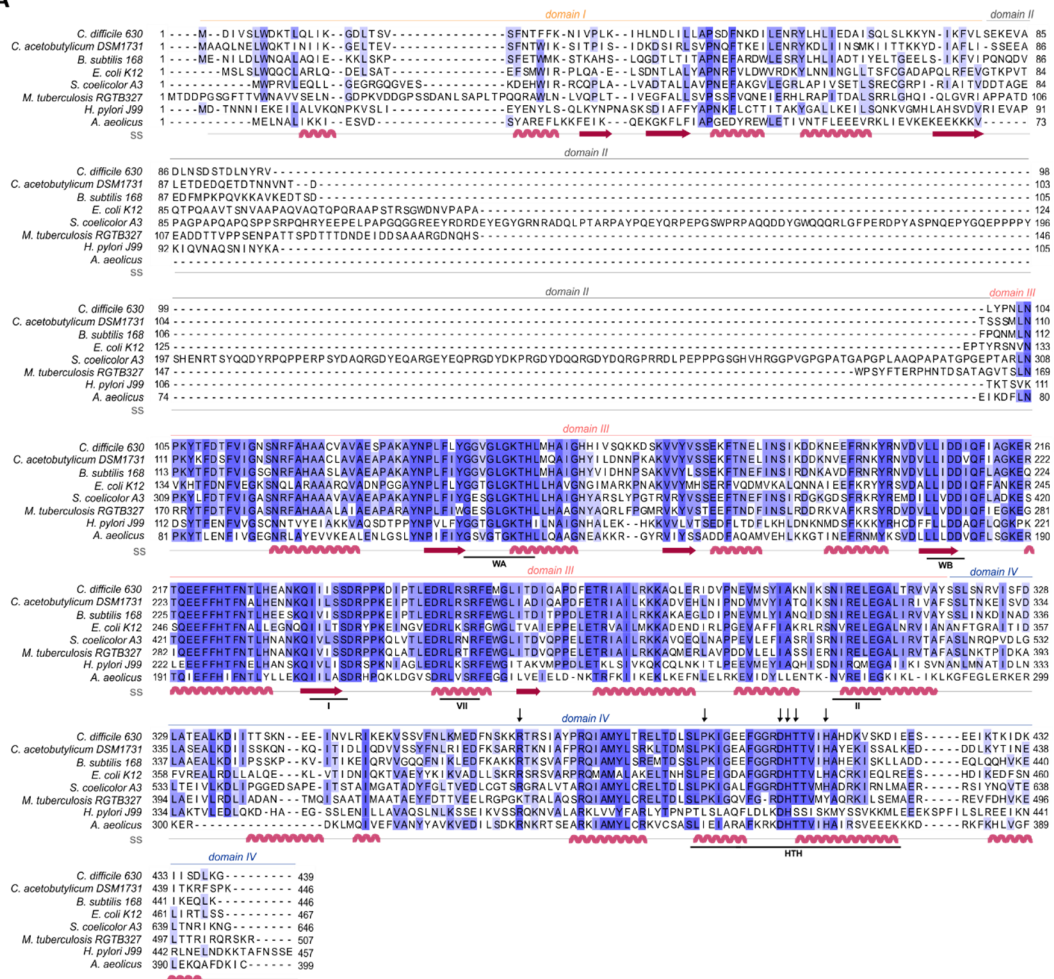

**B**

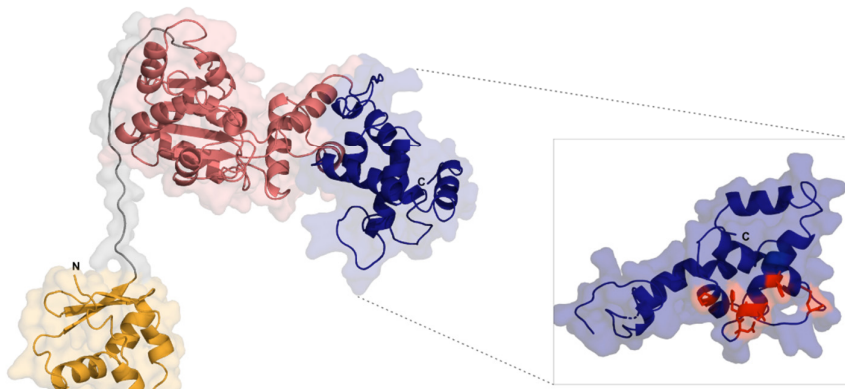

612

613 **Figure 1. *C. difficile* DnaA DNA binding domain is conserved. A)** Multiple sequence  
614 alignment (PRALINE) of *C. difficile* DnaA with homologous proteins retrieved from  
615 GenBank. The aminoacid sequences from *C. difficile* 630 $\Delta$ erm (CEJ96502.1), *C.*  
616 *acetobutylicum* DSM 1731 (AEI33799.1), *B. subtilis* 168 (NP\_387882.1), *E. coli* K-12  
617 (AMH32311.1), *S. coelicolor* A3(2) (TYP16779.1), *M. tuberculosis* RGTB327  
618 (AFE14996.1), *H. pylori* J99 (Q9ZJ96.1) and *Aquifex aeolicus* (WP\_010880157.1) were  
619 used. Residues are colored according to sequence identity conservation highlighted  
620 with blue shading (dark blue more conserved), performed in JalView. Secondary  
621 structure prediction (ss) is indicated, according to Phyre2 modelled structure. DnaA  
622 domains are represented, with the conserved AAA+ ATPase fold motifs Walker A,  
623 Walker B, VII box, sensor I and sensor II highlighted (WA, WB, I, VII and II motifs), as  
624 well as the domain IV helix-turn-helix (HTH). Residues involved in the base-specific  
625 recognition are identified with an arrow. **B)** Structural model of *C. difficile* DnaA  
626 determined by Phyre2. Domains are colored as in alignment. Both the N-terminus and  
627 the C-terminus are indicated in the figure. The DnaA domain IV is enhanced (inset)  
628 with the DnaA-box binding specific residues represented in red sticks.  
629



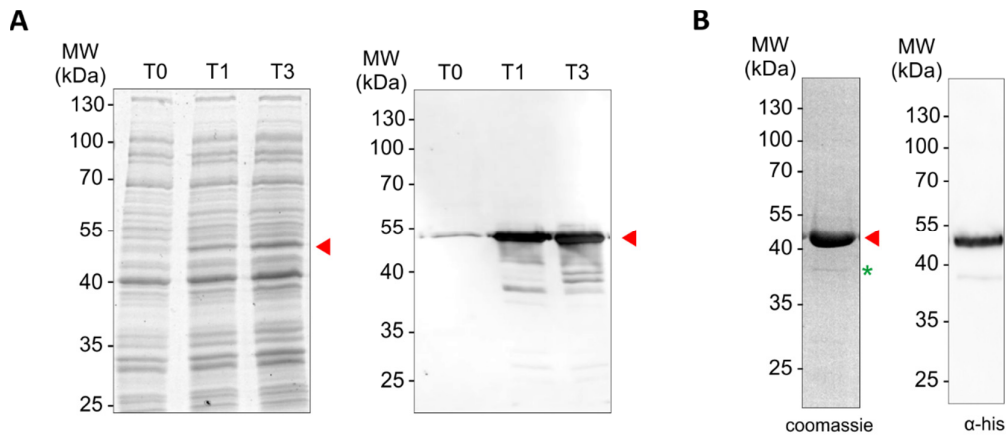

630

631 **Figure 2. Expression and purification of *C. difficile* DnaA protein. A)** *E. coli* expressing  
632 DnaA-6xHis cells were induced with 1 mM IPTG. Optical density-normalized samples  
633 before induction (T0), after 1 hour of induction (T1) and 3 hours of induction (T3) were  
634 resolved by 12% SDS-PAGE and immunoblotted with anti-his antibody. Induced DnaA is  
635 observed with the approximate molecular weight of 51 kDa (red arrow). Possible  
636 breakdown product is observed (blue arrow). **B)** Confirmation of size-exclusion fraction  
637 containing the *C. difficile* DnaA-6xHis and further used for analysis after protein  
638 purification resolved by 12% SDS-PAGE (Coomassie staining) and immunoblotted with  
639 anti-his antibody. DnaA-6xHis is observed with the approximate molecular weight of  
640 ~51 kDa (red arrow). Possible minor breakdown products are observed (green  
641 asterisk).

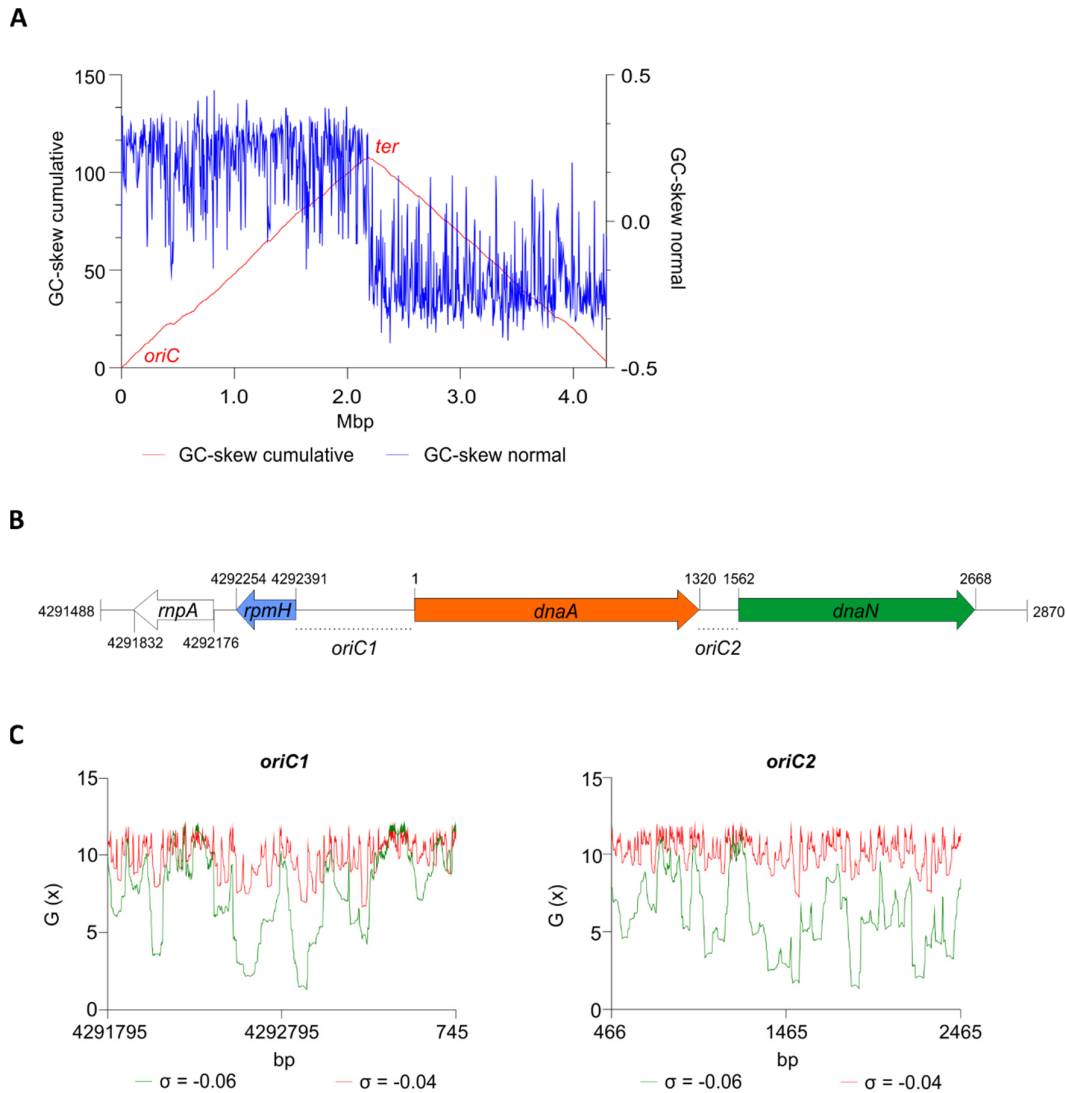

642

643 **Figure 3. Prediction of the *C. difficile* origin of replication.** **A)** GC skew analysis of the  
 644 *C. difficile* 630 $\Delta$ erm (LN614756.1) genome sequence. Normal GC skew analysis ( $[G -$   
 645  $C]/[G + C]$ ) performed on leading strand (blue line) and respective cumulative GC skew  
 646 plot (red line). Calculations were performed with a window size of 4293 bp and a step  
 647 size of 4293 bp. The *origin (oriC)* and *terminus (ter)* regions are indicated. **B)**  
 648 Representation of the predicted origin region and genomic context (from residues at  
 649 position 4291488 to 2870 of the *C. difficile* 630  $\Delta$ erm chromosome). The *rnpA*, *rpmH*  
 650 (blue arrow), *dnaA* (orange arrow) and *dnaN* (green arrow) genes are indicated.  
 651 Putative origins in intergenic regions are represented *oriC1* (*rpmH-dnaA*) and *oriC2*  
 652 (*dnaA-dnaN*). **C)** SIDD analysis of 2.0 kb fragments comprising *oriC1* (nucleotide  
 653 4291795 to 745) and *oriC2* (nucleotide 466 to 2465). Predicted free energies  $G(x)$  for  
 654 duplex destabilization at a superhelical density of  $\sigma = -0.06$  (green) or  $\sigma = -0.04$  (red).

655

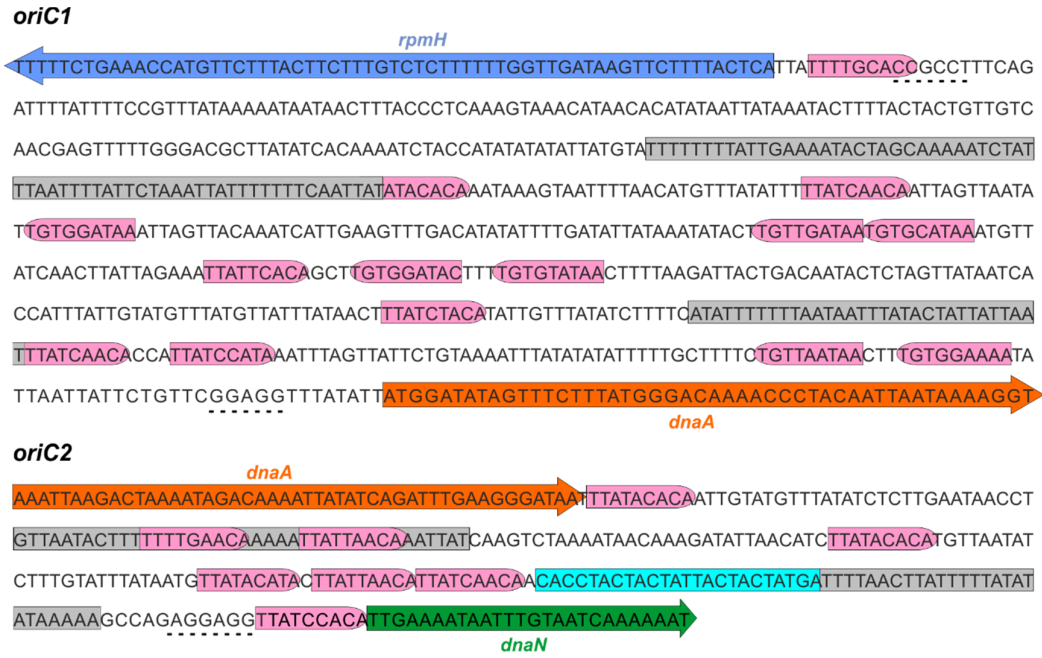

656

657 **Figure 4. Identification of the *C. difficile* *oriC* region.** Nucleotide sequence of the *oriC1*  
 658 region (nucleotide 4292328 to 48 of the *C. difficile* 630Δerm LN614756.1 genome  
 659 sequence) and *oriC2* region (nucleotide 1274 to 1587). Identification of the possible  
 660 unwinding AT-rich regions previously identified in the SIDD analysis (grey boxes). The  
 661 putative DnaA boxes found are represented (pink boxes) and orientation in the leading  
 662 (right) and lagging strand (left) are shown. Possible DnaA-trio sequence are denoted  
 663 (light blue boxes). Coding sequence of the genes *rpmH* (blue arrow), *dnaA* (orange  
 664 arrow) and *dnaN* (green arrow) and respective putative ribosome binding sites (dashed  
 665 line) are indicated. Pattern identification is described in Material and Methods.

666

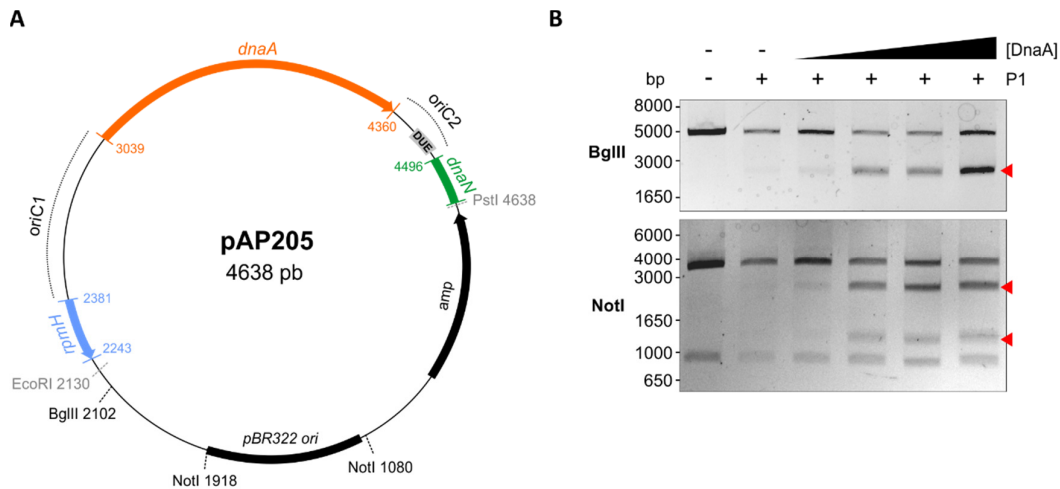

667

668 **Figure 5. Identification of the unwinding region in *C. difficile* *oriC*.** **A)** Representation  
669 of the *oriC1oriC2* containing vector pAP205 used in the P1 nuclease assay. The  
670 predicted *oriC1* and *oriC2* regions (dotted lines) and included genes are represented,  
671 *rpmH* (blue), *dnaA* (orange), and *dnaN* (green). The *bla* gene, the pBR322 plasmid  
672 origin of replication and the positions of used restriction sites are marked. The  
673 unwinding region (DUE) is denoted in a grey circle. **B)** P1 nuclease assay of the  
674 *oriC1oriC2*-containing vector pAP205. Digestion of the vector (lane 1) with different  
675 restriction enzymes BglIII (upper panel), NotI (middle panel) and Scal (bottom panel).  
676 Treatment of the fragments with P1 nuclease only (lane 2) and incubated with  
677 increasing amounts of *C. difficile* DnaA protein (lanes 3-6). The DNA fragments were  
678 separated in a 1% Agarose gel and analyzed with ethidium bromide staining. Resulting  
679 fragments of the DnaA-dependent unwinding are indicated with a red arrow (see  
680 results for details).

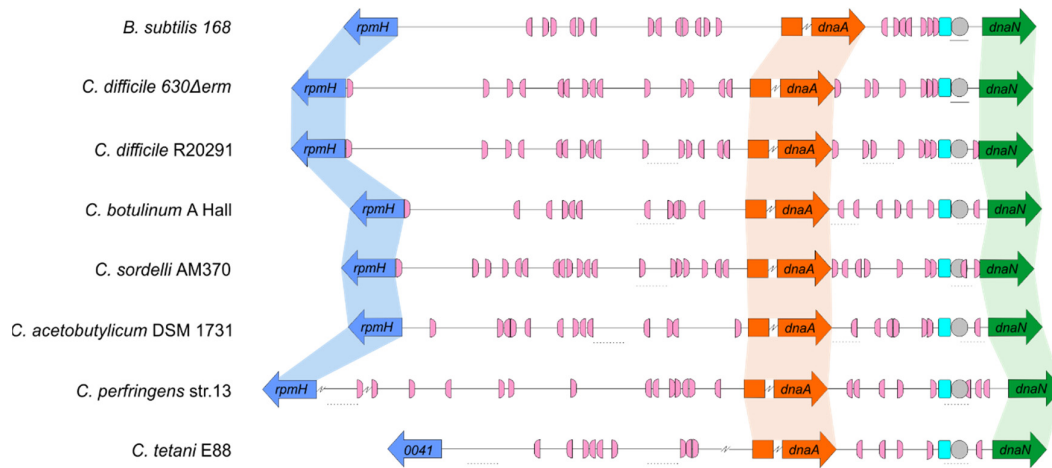

681

682 **Figure 6. Comparison of the clostridia *oriC* regions.** Representation of the origin  
683 region and genomic context of *B. subtilis*, *C. difficile* 630 $\Delta$ *erm* chromosome and the  
684 predicted regions for *C. difficile* R20291, *C. botulinum* A Hall, *C. sordelli* AM370, *C.*  
685 *acetobutylicum* DSM 1731, *C. perfringens* str.13, *C. tetani* E88 (see Table 1). The *rpmH*  
686 (*rpmH* (blue arrow), *dnaA* (orange arrow) and *dnaN* (green arrow) genes are indicated.  
687 Predicted DnaA-boxes are indicated by pink boxes and orientation on the leading  
688 (right) and lagging strand (left) are shown. Identification of the experimentally  
689 identified unwinding AT-rich regions (lines) and the SIDD-predicted helical instability  
690 are shown (dashed lines). The putative DUE is denoted (grey circle). Possible DnaA-trio  
691 sequences are shown in light blue boxes. See Material and Methods for detailed  
692 information. Alignment of the represented chromosomal regions is based on the  
693 location of the DnaA-trio.

694 **References**

- 695 Abe, Y., Jo, T., Matsuda, Y., Matsunaga, C., Katayama, T., and Ueda, T. (2007). Structure  
696 and function of DnaA N-terminal domains: specific sites and mechanisms in  
697 inter-DnaA interaction and in DnaB helicase loading on oriC. *J Biol Chem*  
698 282(24), 17816-17827. doi: 10.1074/jbc.M701841200.
- 699 Bawono, P., and Heringa, J. (2014). PRALINE: a versatile multiple sequence alignment  
700 toolkit. *Methods Mol Biol* 1079, 245-262. doi: 10.1007/978-1-62703-646-7\_16.
- 701 Bazin, A., Cherrier, M.V., Gutsche, I., Timmins, J., and Terradot, L. (2015). Structure and  
702 primase-mediated activation of a bacterial dodecameric replicative helicase.  
703 *Nucleic Acids Res.* doi: 10.1093/nar/gkv792.
- 704 Blaesing, F., Weigel, C., Welzeck, M., and Messer, W. (2000). Analysis of the DNA-  
705 binding domain of Escherichia coli DnaA protein. *Mol Microbiol* 36(3), 557-569.  
706 doi: 10.1046/j.1365-2958.2000.01881.x.
- 707 Bleichert, F., Botchan, M.R., and Berger, J.M. (2017). Mechanisms for initiating cellular  
708 DNA replication. *Science* 355(6327). doi: 10.1126/science.aah6317.
- 709 Boonstra, M., de Jong, I.G., Scholefield, G., Murray, H., Kuipers, O.P., and Veening, J.W.  
710 (2013). Spo0A regulates chromosome copy number during sporulation by  
711 directly binding to the origin of replication in Bacillus subtilis. *Mol Microbiol*  
712 87(4), 925-938. doi: 10.1111/mmi.12141.
- 713 Briggs, G.S., Smits, W.K., and Soutanas, P. (2012). Chromosomal replication initiation  
714 machinery of low-G+C-content Firmicutes. *J Bacteriol* 194(19), 5162-5170. doi:  
715 10.1128/JB.00865-12.
- 716 Cho, E., Ogasawara, N., and Ishikawa, S. (2008). The functional analysis of YabA, which  
717 interacts with DnaA and regulates initiation of chromosome replication in  
718 Bacillus subtilis. *Genes Genet Syst* 83(2), 111-125. doi: 10.1266/ggs.83.111.
- 719 Chodavarapu, S., Felczak, M.M., Yaniv, J.R., and Kaguni, J.M. (2008). Escherichia coli  
720 DnaA interacts with HU in initiation at the E. coli replication origin. *Mol*  
721 *Microbiol* 67(4), 781-792. doi: 10.1111/j.1365-2958.2007.06094.x.
- 722 Chodavarapu, S., and Kaguni, J.M. (2016). Replication Initiation in Bacteria. *Enzymes*  
723 39, 1-30. doi: 10.1016/bs.enz.2016.03.001.
- 724 Crobach, M.J.T., Vernon, J.J., Loo, V.G., Kong, L.Y., Pechine, S., Wilcox, M.H., et al.  
725 (2018). Understanding Clostridium difficile Colonization. *Clin Microbiol Rev*  
726 31(2). doi: 10.1128/CMR.00021-17.
- 727 Davey, M.J., and O'Donnell, M. (2003). Replicative helicase loaders: ring breakers and  
728 ring makers. *Current Biology* 13(15), R594-R596. doi: 10.1016/s0960-  
729 9822(03)00523-2.
- 730 Donczew, R., Weigel, C., Lurz, R., Zakrzewska-Czerwinska, J., and Zawilak-Pawlik, A.  
731 (2012). Helicobacter pylori oriC--the first bipartite origin of chromosome  
732 replication in Gram-negative bacteria. *Nucleic Acids Res* 40(19), 9647-9660. doi:  
733 10.1093/nar/gks742.
- 734 Ekundayo, B., and Bleichert, F. (2019). Origins of DNA replication. *PLoS Genet* 15(9),  
735 e1008320. doi: 10.1371/journal.pgen.1008320.
- 736 Erzberger, J.P., Mott, M.L., and Berger, J.M. (2006). Structural basis for ATP-dependent  
737 DnaA assembly and replication-origin remodeling. *Nat Struct Mol Biol* 13(8),  
738 676-683. doi: 10.1038/nsmb1115.

- 739 Erzberger, J.P., Pirruccello, M.M., and Berger, J.M. (2002). The structure of bacterial  
740 DnaA: implications for general mechanisms underlying DNA replication  
741 initiation. *EMBO J* 21(18), 4763-4773.
- 742 Fossum, S., De Pascale, G., Weigel, C., Messer, W., Donadio, S., and Skarstad, K. (2008).  
743 A robust screen for novel antibiotics: specific knockout of the initiator of  
744 bacterial DNA replication. *FEMS Microbiol Lett* 281(2), 210-214. doi:  
745 10.1111/j.1574-6968.2008.01103.x.
- 746 Fujikawa, N., Kurumizaka, H., Nureki, O., Terada, T., Shirouzu, M., Katayama, T., et al.  
747 (2003). Structural basis of replication origin recognition by the DnaA protein.  
748 *Nucleic Acids Res* 31(8), 2077-2086.
- 749 Goranov, A.I., Breier, A.M., Merrikh, H., and Grossman, A.D. (2009). YabA of *Bacillus*  
750 *subtilis* controls DnaA-mediated replication initiation but not the transcriptional  
751 response to replication stress. *Mol Microbiol* 74(2), 454-466. doi:  
752 10.1111/j.1365-2958.2009.06876.x.
- 753 Grimwade, J.E., and Leonard, A.C. (2017). Targeting the Bacterial Orisome in the Search  
754 for New Antibiotics. *Front Microbiol* 8, 2352. doi: 10.3389/fmicb.2017.02352.
- 755 Ishigo-Oka, D., Ogasawara, N., and Moriya, S. (2001). DnaD protein of *Bacillus subtilis*  
756 interacts with DnaA, the initiator protein of replication. *J Bacteriol* 183(6),  
757 2148-2150. doi: 10.1128/JB.183.6.2148-2150.2001.
- 758 Jameson, K.H., Rostami, N., Fogg, M.J., Turkenburg, J.P., Grahl, A., Murray, H., et al.  
759 (2014). Structure and interactions of the *Bacillus subtilis* sporulation inhibitor of  
760 DNA replication, SirA, with domain I of DnaA. *Mol Microbiol* 93(5), 975-991. doi:  
761 10.1111/mmi.12713.
- 762 Jameson, K.H., and Wilkinson, A.J. (2017). Control of Initiation of DNA Replication in  
763 *Bacillus subtilis* and *Escherichia coli*. *Genes (Basel)* 8(1). doi:  
764 10.3390/genes8010022.
- 765 Jaworski, P., Donczew, R., Mielke, T., Thiel, M., Oldziej, S., Weigel, C., et al. (2016).  
766 Unique and Universal Features of Epsilonproteobacterial Origins of  
767 Chromosome Replication and DnaA-DnaA Box Interactions. *Front Microbiol* 7,  
768 1555. doi: 10.3389/fmicb.2016.01555.
- 769 Katayama, T., Kasho, K., and Kawakami, H. (2017). The DnaA Cycle in *Escherichia coli*:  
770 Activation, Function and Inactivation of the Initiator Protein. *Front Microbiol* 8,  
771 2496. doi: 10.3389/fmicb.2017.02496.
- 772 Katayama, T., Ozaki, S., Keyamura, K., and Fujimitsu, K. (2010). Regulation of the  
773 replication cycle: conserved and diverse regulatory systems for DnaA and *oriC*.  
774 *Nat Rev Microbiol* 8(3), 163-170. doi: 10.1038/nrmicro2314.
- 775 Kawakami, H., Keyamura, K., and Katayama, T. (2005). Formation of an ATP-DnaA-  
776 specific initiation complex requires DnaA Arginine 285, a conserved motif in the  
777 AAA+ protein family. *J Biol Chem* 280(29), 27420-27430. doi:  
778 10.1074/jbc.M502764200.
- 779 Kelley, L.A., Mezulis, S., Yates, C.M., Wass, M.N., and Sternberg, M.J. (2015). The  
780 Phyre2 web portal for protein modeling, prediction and analysis. *Nat Protoc*  
781 10(6), 845-858. doi: 10.1038/nprot.2015.053.
- 782 Kim, J.S., Nanfara, M.T., Chodavarapu, S., Jin, K.S., Babu, V.M.P., Ghazy, M.A., et al.  
783 (2017). Dynamic assembly of Hda and the sliding clamp in the regulation of  
784 replication licensing. *Nucleic Acids Res* 45(7), 3888-3905. doi:  
785 10.1093/nar/gkx081.

- 786 Kowalski, D., and Eddy, M.J. (1989). The DNA unwinding element: a novel, cis-acting  
787 component that facilitates opening of the Escherichia coli replication origin.  
788 *EMBO J* 8(13), 4335-4344.
- 789 Krause, M., Ruckert, B., Lurz, R., and Messer, W. (1997). Complexes at the replication  
790 origin of Bacillus subtilis with homologous and heterologous DnaA protein. *J*  
791 *Mol Biol* 274(3), 365-380. doi: 10.1006/jmbi.1997.1404.
- 792 Lawson, P.A., Citron, D.M., Tyrrell, K.L., and Finegold, S.M. (2016). Reclassification of  
793 Clostridium difficile as Clostridioides difficile (Hall and O'Toole 1935) Prevot  
794 1938. *Anaerobe* 40, 95-99. doi: 10.1016/j.anaerobe.2016.06.008.
- 795 Luo, H., and Gao, F. (2019). DoriC 10.0: an updated database of replication origins in  
796 prokaryotic genomes including chromosomes and plasmids. *Nucleic Acids Res*  
797 47(D1), D74-D77. doi: 10.1093/nar/gky1014.
- 798 Mackiewicz, P., Zakrzewska-Czerwinska, J., Zawilak, A., Dudek, M.R., and Cebrat, S.  
799 (2004). Where does bacterial replication start? Rules for predicting the oriC  
800 region. *Nucleic Acids Res* 32(13), 3781-3791. doi: 10.1093/nar/gkh699.
- 801 Majka, J., Messer, W., Schrenpf, H., and Zakrzewska-Czerwinska, J. (1997). *Purification*  
802 *and characterization of the Streptomyces lividans initiator protein DnaA.*
- 803 Marsin, S., McGovern, S., Ehrlich, S.D., Bruand, C., and Polard, P. (2001). Early steps of  
804 Bacillus subtilis primosome assembly. *J Biol Chem* 276(49), 45818-45825. doi:  
805 10.1074/jbc.M101996200.
- 806 Martin, E., Williams, H.E.L., Pitoulis, M., Stevens, D., Winterhalter, C., Craggs, T.D., et  
807 al. (2018). DNA replication initiation in Bacillus subtilis: structural and  
808 functional characterization of the essential DnaA-DnaD interaction. *Nucleic*  
809 *Acids Res.* doi: 10.1093/nar/gky1220.
- 810 Matthews, L.A., and Simmons, L.A. (2019). Cryptic protein interactions regulate DNA  
811 replication initiation. *Mol Microbiol* 111(1), 118-130. doi: 10.1111/mmi.14142.
- 812 Moriya, S., Fukuoka, T., Ogasawara, N., and Yoshikawa, H. (1988). Regulation of  
813 initiation of the chromosomal replication by DnaA-boxes in the origin region of  
814 the Bacillus subtilis chromosome. *EMBO J* 7(9), 2911-2917.
- 815 Mott, M.L., and Berger, J.M. (2007). DNA replication initiation: mechanisms and  
816 regulation in bacteria. *Nat Rev Microbiol* 5(5), 343-354. doi:  
817 10.1038/nrmicro1640.
- 818 Mrazek, J., and Xie, S. (2006). Pattern locator: a new tool for finding local sequence  
819 patterns in genomic DNA sequences. *Bioinformatics* 22(24), 3099-3100. doi:  
820 10.1093/bioinformatics/btl551.
- 821 Murray, H., and Koh, A. (2014). Multiple regulatory systems coordinate DNA  
822 replication with cell growth in Bacillus subtilis. *PLoS Genet* 10(10), e1004731.  
823 doi: 10.1371/journal.pgen.1004731.
- 824 Natrajan, G., Noirot-Gros, M.F., Zawilak-Pawlik, A., Kapp, U., and Terradot, L. (2009).  
825 The structure of a DnaA/HobA complex from Helicobacter pylori provides  
826 insight into regulation of DNA replication in bacteria. *Proc Natl Acad Sci U S A*  
827 106(50), 21115-21120. doi: 10.1073/pnas.0908966106.
- 828 Necsulea, A., and Lobry, J.R. (2007). A new method for assessing the effect of  
829 replication on DNA base composition asymmetry. *Mol Biol Evol* 24(10), 2169-  
830 2179. doi: 10.1093/molbev/msm148.
- 831 Nowaczyk-Cieszewska, M., Zyla-Uklejewicz, D., Noszka, M., Jaworski, P., Mielke, T., and  
832 Zawilak-Pawlik, A.M. (2019). The role of Helicobacter pylori DnaA domain I in



- 833 orisome assembly on a bipartite origin of chromosome replication. *Mol*  
834 *Microbiol.* doi: 10.1111/mmi.14423.
- 835 Nozaki, S., and Ogawa, T. (2008). Determination of the minimum domain II size of  
836 Escherichia coli DnaA protein essential for cell viability. *Microbiology* 154(Pt  
837 11), 3379-3384. doi: 10.1099/mic.0.2008/019745-0.
- 838 O'Donnell, M., Langston, L., and Stillman, B. (2013). Principles and concepts of DNA  
839 replication in bacteria, archaea, and eukarya. *Cold Spring Harb Perspect Biol*  
840 5(7). doi: 10.1101/cshperspect.a010108.
- 841 Ogasawara, N., Moriya, S., von Meyenburg, K., Hansen, F.G., and Yoshikawa, H. (1985).  
842 Conservation of genes and their organization in the chromosomal replication  
843 origin region of Bacillus subtilis and Escherichia coli. *EMBO J* 4(12), 3345-3350.
- 844 Ogasawara, N., and Yoshikawa, H. (1992). Genes and their organization in the  
845 replication origin region of the bacterial chromosome. *Mol Microbiol* 6(5), 629-  
846 634. doi: 10.1111/j.1365-2958.1992.tb01510.x.
- 847 Oliveira Paiva, A.M., Friggen, A.H., Qin, L., Douwes, R., Dame, R.T., and Smits, W.K.  
848 (2019). The Bacterial Chromatin Protein HupA Can Remodel DNA and  
849 Associates with the Nucleoid in Clostridium difficile. *J Mol Biol* 431(4), 653-672.  
850 doi: 10.1016/j.jmb.2019.01.001.
- 851 Ozaki, S., and Katayama, T. (2012). Highly organized DnaA-oriC complexes recruit the  
852 single-stranded DNA for replication initiation. *Nucleic Acids Res* 40(4), 1648-  
853 1665. doi: 10.1093/nar/gkr832.
- 854 Ozaki, S., Kawakami, H., Nakamura, K., Fujikawa, N., Kagawa, W., Park, S.Y., et al.  
855 (2008). A common mechanism for the ATP-DnaA-dependent formation of open  
856 complexes at the replication origin. *J Biol Chem* 283(13), 8351-8362. doi:  
857 10.1074/jbc.M708684200.
- 858 Ozaki, S., Noguchi, Y., Hayashi, Y., Miyazaki, E., and Katayama, T. (2012). Differentiation  
859 of the DnaA-oriC subcomplex for DNA unwinding in a replication initiation  
860 complex. *J Biol Chem* 287(44), 37458-37471. doi: 10.1074/jbc.M112.372052.
- 861 Patel, M.J., Bhatia, L., Yilmaz, G., Biswas-Fiss, E.E., and Biswas, S.B. (2017). Multiple  
862 conformational states of DnaA protein regulate its interaction with DnaA boxes  
863 in the initiation of DNA replication. *Biochim Biophys Acta.* doi:  
864 10.1016/j.bbagen.2017.06.013.
- 865 Richardson, T.T., Harran, O., and Murray, H. (2016). The bacterial DnaA-trio replication  
866 origin element specifies single-stranded DNA initiator binding. *Nature*  
867 534(7607), 412-416. doi: 10.1038/nature17962.
- 868 Richardson, T.T., Stevens, D., Pellicciari, S., Harran, O., Sperlea, T., and Murray, H.  
869 (2019). Identification of a basal system for unwinding a bacterial chromosome  
870 origin. *EMBO J* 38(15), e101649. doi: 10.15252/embj.2019101649.
- 871 Rokop, M.E., Auchtung, J.M., and Grossman, A.D. (2004). Control of DNA replication  
872 initiation by recruitment of an essential initiation protein to the membrane of  
873 Bacillus subtilis. *Mol Microbiol* 52(6), 1757-1767. doi: 10.1111/j.1365-  
874 2958.2004.04091.x.
- 875 Rosenbusch, K.E., Bakker, D., Kuijper, E.J., and Smits, W.K. (2012). C. difficile 630Derm  
876 Spo0A Regulates Sporulation, but Does Not Contribute to Toxin Production, by  
877 Direct High-Affinity Binding to Target DNA. *PloS One.* doi:  
878 10.1371/journal.pone.0048608.

- 879 Sambrook, J., Fritsch, E.F., and Maniatis, T. (1989). *Molecular cloning : a laboratory*  
880 *manual*. Cold Spring Harbor, N.Y.: Cold Spring Harbor Laboratory.
- 881 Saxena, R., Fingland, N., Patil, D., Sharma, A.K., and Crooke, E. (2013). Crosstalk  
882 between DnaA protein, the initiator of Escherichia coli chromosomal  
883 replication, and acidic phospholipids present in bacterial membranes. *Int J Mol*  
884 *Sci* 14(4), 8517-8537. doi: 10.3390/ijms14048517.
- 885 Schaper, S., and Messer, W. (1995). Interaction of the initiator protein DnaA of  
886 Escherichia coli with its DNA target. *J Biol Chem* 270(29), 17622-17626. doi:  
887 10.1074/jbc.270.29.17622.
- 888 Schenk, K., Hervas, A.B., Rosch, T.C., Eisemann, M., Schmitt, B.A., Dahlke, S., et al.  
889 (2017). Rapid turnover of DnaA at replication origin regions contributes to  
890 initiation control of DNA replication. *PLoS Genet* 13(2), e1006561. doi:  
891 10.1371/journal.pgen.1006561.
- 892 Scholefield, G., Errington, J., and Murray, H. (2012). Soj/ParA stalls DNA replication by  
893 inhibiting helix formation of the initiator protein DnaA. *EMBO J* 31(6), 1542-  
894 1555. doi: 10.1038/emboj.2012.6.
- 895 Scholefield, G., and Murray, H. (2013). YabA and DnaD inhibit helix assembly of the  
896 DNA replication initiation protein DnaA. *Mol Microbiol* 90(1), 147-159. doi:  
897 10.1111/mmi.12353.
- 898 Seid, C.A., Smith, J.L., and Grossman, A.D. (2017). Genetic and biochemical interactions  
899 between the bacterial replication initiator DnaA and the nucleoid-associated  
900 protein Rok in Bacillus subtilis. *Mol Microbiol* 103(5), 798-817. doi:  
901 10.1111/mmi.13590.
- 902 Sekimizu, K., Bramhill, D., and Kornberg, A. (1988). Sequential early stages in the in  
903 vitro initiation of replication at the origin of the Escherichia coli chromosome. *J*  
904 *Biol Chem* 263(15), 7124-7130.
- 905 Smits, W.K., Goranov, A.I., and Grossman, A.D. (2010). Ordered association of helicase  
906 loader proteins with the Bacillus subtilis origin of replication in vivo. *Mol*  
907 *Microbiol* 75(2), 452-461. doi: 10.1111/j.1365-2958.2009.06999.x.
- 908 Smits, W.K., Lyras, D., Lacy, D.B., Wilcox, M.H., and Kuijper, E.J. (2016). Clostridium  
909 difficile infection. *Nature Reviews Disease Primers* 2, 16020. doi:  
910 10.1038/nrdp.2016.20.
- 911 Smits, W.K., Merrikkh, H., Bonilla, C.Y., and Grossman, A.D. (2011). Primosomal proteins  
912 DnaD and DnaB are recruited to chromosomal regions bound by DnaA in  
913 Bacillus subtilis. *J Bacteriol* 193(3), 640-648. doi: 10.1128/JB.01253-10.
- 914 Speck, C., Weigel, C., and Messer, W. (1999). ATP- and ADP-dnaA protein, a molecular  
915 switch in gene regulation. *EMBO J* 18(21), 6169-6176. doi:  
916 10.1093/emboj/18.21.6169.
- 917 Sutton, M.D., and Kaguni, J.M. (1997). Novel alleles of the Escherichia coli dnaA gene. *J*  
918 *Mol Biol* 271(5), 693-703. doi: 10.1006/jmbi.1997.1209.
- 919 Torti, A., Lossani, A., Savi, L., Focher, F., Wright, G.E., Brown, N.C., et al. (2011).  
920 Clostridium difficile DNA polymerase IIIc: basis for activity of antibacterial  
921 compounds. *Current Enzyme Inhibition* 7(October).
- 922 Tsodikov, O.V., and Biswas, T. (2011). Structural and thermodynamic signatures of DNA  
923 recognition by Mycobacterium tuberculosis DnaA. *J Mol Biol* 410(3), 461-476.  
924 doi: 10.1016/j.jmb.2011.05.007.

- 925 van Eijk, E., Anvar, S.Y., Browne, H.P., Leung, W.Y., Frank, J., Schmitz, A.M., et al.  
926 (2015). Complete genome sequence of the *Clostridium difficile* laboratory  
927 strain 630Deltaerm reveals differences from strain 630, including translocation  
928 of the mobile element CTn5. *BMC Genomics* 16, 31. doi: 10.1186/s12864-015-  
929 1252-7.
- 930 van Eijk, E., Boekhoud, I.M., Kuijper, E.J., Bos-Sanders, I., Wright, G., and Smits, W.K.  
931 (2019). Genome Location Dictates the Transcriptional Response to PolC  
932 Inhibition in *Clostridium difficile*. *Antimicrob Agents Chemother* 63(2). doi:  
933 10.1128/AAC.01363-18.
- 934 van Eijk, E., Paschalis, V., Green, M., Friggen, A.H., Larson, M.A., Spriggs, K., et al.  
935 (2016). Primase is required for helicase activity and helicase alters the  
936 specificity of primase in the enteropathogen *Clostridium difficile*. *Open Biol*  
937 6(12). doi: 10.1098/rsob.160272.
- 938 van Eijk, E., Wittekoek, B., Kuijper, E.J., and Smits, W.K. (2017). DNA replication  
939 proteins as potential targets for antimicrobials in drug-resistant bacterial  
940 pathogens. *J Antimicrob Chemother* 72(5), 1275-1284. doi:  
941 10.1093/jac/dkw548.
- 942 Vellanoweth, R.L., and Rabinowitz, J.C. (1992). The influence of ribosome-binding-site  
943 elements on translational efficiency in *Bacillus subtilis* and *Escherichia coli* in  
944 vivo. *Mol Microbiol* 6(9), 1105-1114. doi: 10.1111/j.1365-2958.1992.tb01548.x.
- 945 Velten, M., McGovern, S., Marsin, S., Ehrlich, S.D., Noirot, P., and Polard, P. (2003). A  
946 two-protein strategy for the functional loading of a cellular replicative DNA  
947 helicase. *Mol Cell* 11(4), 1009-1020. doi: 10.1016/s1097-2765(03)00130-8.
- 948 Warriner, K., Xu, C., Habash, M., Sultan, S., and Weese, S.J. (2017). Dissemination of  
949 *Clostridium difficile* in food and the environment: Significant sources of C.  
950 *difficile* community-acquired infection? *J Appl Microbiol* 122(3), 542-553. doi:  
951 10.1111/jam.13338.
- 952 Weigel, C., Schmidt, A., Seitz, H., Tungler, D., Welzeck, M., and Messer, W. (1999). The  
953 N-terminus promotes oligomerization of the *Escherichia coli* initiator protein  
954 DnaA. *Mol Microbiol* 34(1), 53-66. doi: 10.1046/j.1365-2958.1999.01568.x.
- 955 Wolanski, M., Donczew, R., Zawilak-Pawlik, A., and Zakrzewska-Czerwinska, J. (2014).  
956 oriC-encoded instructions for the initiation of bacterial chromosome  
957 replication. *Front Microbiol* 5, 735. doi: 10.3389/fmicb.2014.00735.
- 958 Xu, W.C., Silverman, M.H., Yu, X.Y., Wright, G., and Brown, N. (2019). Discovery and  
959 development of DNA polymerase III C inhibitors to treat Gram-positive  
960 infections. *Bioorg Med Chem* 27(15), 3209-3217. doi:  
961 10.1016/j.bmc.2019.06.017.
- 962 Zawilak-Pawlik, A., Kois, A., Majka, J., Jakimowicz, D., Smulczyk-Krawczynszyn, A.,  
963 Messer, W., et al. (2005). Architecture of bacterial replication initiation  
964 complexes: orisomes from four unrelated bacteria. *Biochem J* 389(Pt 2), 471-  
965 481. doi: 10.1042/BJ20050143.
- 966 Zawilak-Pawlik, A., Nowaczyk, M., and Zakrzewska-Czerwinska, J. (2017). The Role of  
967 the N-Terminal Domains of Bacterial Initiator DnaA in the Assembly and  
968 Regulation of the Bacterial Replication Initiation Complex. *Genes (Basel)* 8(5).  
969 doi: 10.3390/genes8050136.

- 970 Zawilak, A., Durrant, M.C., Jakimowicz, P., Backert, S., and Zakrzewska-Czerwinska, J.  
971 (2003). DNA binding specificity of the replication initiator protein, DnaA from  
972 *Helicobacter pylori*. *J Mol Biol* 334(5), 933-947.  
973 Zhabinskaya, D., Madden, S., and Benham, C.J. (2015). SIST: stress-induced structural  
974 transitions in superhelical DNA. *Bioinformatics* 31(3), 421-422. doi:  
975 10.1093/bioinformatics/btu657.  
976 Zhang, W., Carneiro, M.J., Turner, I.J., Allen, S., Roberts, C.J., and Soultanas, P. (2005).  
977 The *Bacillus subtilis* DnaD and DnaB proteins exhibit different DNA remodelling  
978 activities. *J Mol Biol* 351(1), 66-75. doi: 10.1016/j.jmb.2005.05.065.  
979 Zorman, S., Seitz, H., Sclavi, B., and Strick, T.R. (2012). Topological characterization of  
980 the DnaA-oriC complex using single-molecule nanomanipulation. *Nucleic Acids*  
981 *Res* 40(15), 7375-7383. doi: 10.1093/nar/gks371.

982
